# Supplementary material for: Occurrence, Fate, and Related Health Risks of PFAS in Raw and Produced Drinking Water
Source: PubMed Central journal article supplement (PMC9979608; doi:10.1021/acs.est.2c06015), 2023-02-13
Supplement: es2c06015_si_001.pdf [file es2c06015_si_001.pdf]

## Supplementary information

### Occurrence, fate and related health risks of PFAS in raw and produced drinking water

Mohammad Sadia<sup>a\*</sup>, Ingeborg Nollen<sup>a</sup>, Rick Helmus<sup>a</sup>, Thomas L. ter Laak<sup>a,b</sup>, Frederic Béen<sup>b</sup>, Antonia Praetorius<sup>a</sup>, Annemarie P. van Wezel<sup>a</sup>

<sup>a</sup>Institute for Biodiversity and Ecosystem Dynamics, University of Amsterdam, P.O. Box 94240, 1090 GE Amsterdam, The Netherlands.

<sup>b</sup>KWR Water Research Institute, P.O. Box 1072, 3430 BB, Nieuwegein, The Netherlands

**Corresponding author:** email [m.s.sadia@uva.nl](mailto:m.s.sadia@uva.nl)

Summary: 18 pages, 1 section, 5 figures, 3 tables

#### The following information is included

| Content   | Page                                                                                           |     |
|-----------|------------------------------------------------------------------------------------------------|-----|
| Section 1 | Quantification and quality control.                                                            | S2  |
| Figure S1 | Schematic of the experimental study design.                                                    | S3  |
| Figure S2 | Average recovery of mass-labeled standard in all water samples.                                | S3  |
| Figure S3 | Response of mass labeled standard in the drinking water extracted with different sorbent size. | S4  |
| Figure S4 | Relative contribution per PFAS class.                                                          | S4  |
| Figure S5 | Removal efficiencies (%) in drinking water regarding chain length (C4-C10)                     | S5  |
| Table S1  | Information about the analytical standards, and the method limit of detection (LOD).           | S5  |
| Table S2  | Relative potency factors (RPF) for PFAS.                                                       | S9  |
| Table S3  | Results per individual PFAS and location                                                       | S10 |
| Reference |                                                                                                | S18 |

### 13 **Quantification and quality control**

14 Identification and confirmation of target compounds were achieved by: firstly accurate mass  
15 measurements of the protonated and deprotonated molecular ions within a mass window of  
16 2 ppm; secondly retention time match ( $\leq 0.20$  min) of analytes detected in samples with  
17 corresponding standards in calibration solution; thirdly match between one fragment or product  
18 ions of analytes acquired previously identified in calibration standard solution and those  
19 determined in samples. Thus, the acquisition of a high-resolution precursor ion in combination  
20 with at least one product ion and the LC relative retention time met more than the criteria  
21 requirement of 5 identification points for the HR-MSMS instrumentation. List of all target  
22 analytes, their exact mass, and product ion used for confirmation are shown in Table S1.

23 The branched isomers for (PFOS, PFHxS, EtFOSAA, MeFOSAA) were investigated and used  
24 branched isomers standard for quantification. For PFOA and PFHpS were investigated using the  
25 linear standard for the quantification (semi-quantification). No branched isomers were detected  
26 for other PFAS. All branched isomers were reported as the sum of all branched isomers for each  
27 of 6 PFAS.

28 Each batch of samples, three procedural blanks (Milli-Q water) were extracted simultaneously  
29 and analysed for assessing the background contamination introduced and originating throughout  
30 the extraction from various sources in the laboratory. One quality control sample (Milli-Q water  
31 spiked with native standards) was also extracted and analysed in order to simultaneously  
32 evaluate the repeatability of the analytical method and investigate any systematic errors.

33 Quantification of the targeted analytes was based on internal calibration with its corresponding  
34 mass-labeled standard. For compounds that have no corresponding labelled analog standard, a  
35 mass-labeled standard with similar function group and contiguous carbon-chain length was used  
36 (Table S1). Methanol injections were carried out after and before the standard injection to assess  
37 any carryover or contamination in the LC system.

38 An isolator column (Waters Corporation Milford, USA) had been installed after the solvent  
 39 mixer of the LC pump before the sample injector to separate any contamination  
 40 associated/originating from the LC system.

| Chromatographic column                                                                                                                 | Mobile phase                                                                                                                    | Additives                                                                                                                                             | Ion source                                                                                                                                  |
|----------------------------------------------------------------------------------------------------------------------------------------|---------------------------------------------------------------------------------------------------------------------------------|-------------------------------------------------------------------------------------------------------------------------------------------------------|---------------------------------------------------------------------------------------------------------------------------------------------|
| <ul style="list-style-type: none"> <li>• Kinetex F5</li> <li>• Biphenyl</li> <li>• Mixed-mode WAX</li> <li>• CSH C18 column</li> </ul> | <ul style="list-style-type: none"> <li>• Methanol (MeOH)</li> <li>• Acetonitrile (ACN)</li> <li>• Mixture MeOH + ACN</li> </ul> | <ul style="list-style-type: none"> <li>• Ammonium acetate</li> <li>• Acetic acid</li> <li>• Ammonia solution</li> <li>• 1-methylpiperidine</li> </ul> | <ul style="list-style-type: none"> <li>• Electro Spray Ionization (ESI)</li> <li>• Ion Booster Electro Spray Ionization (IB-ESI)</li> </ul> |

**Figure S1.** Schematic of the experimental study design for chromatographic and ionization optimization

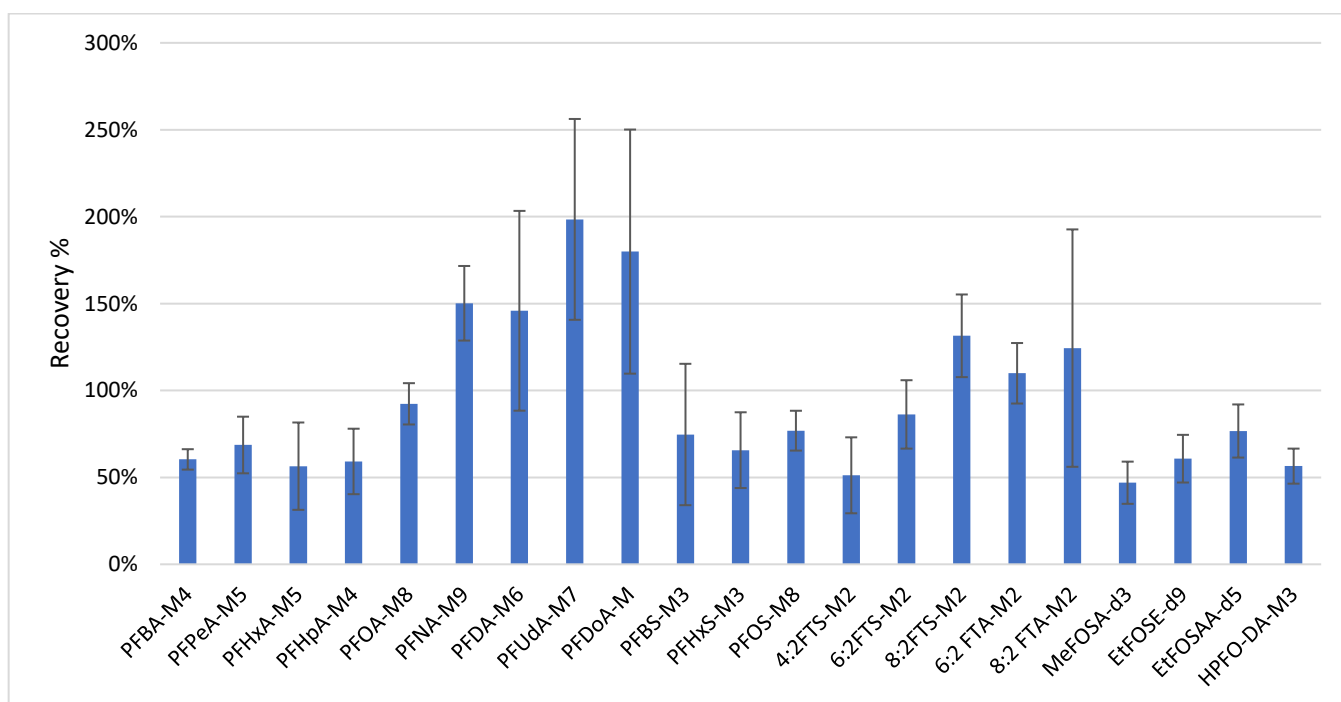

**Figure S2.** Average recoveries of mass-labeled standard in all water samples. Error bar indicates the standard deviation.

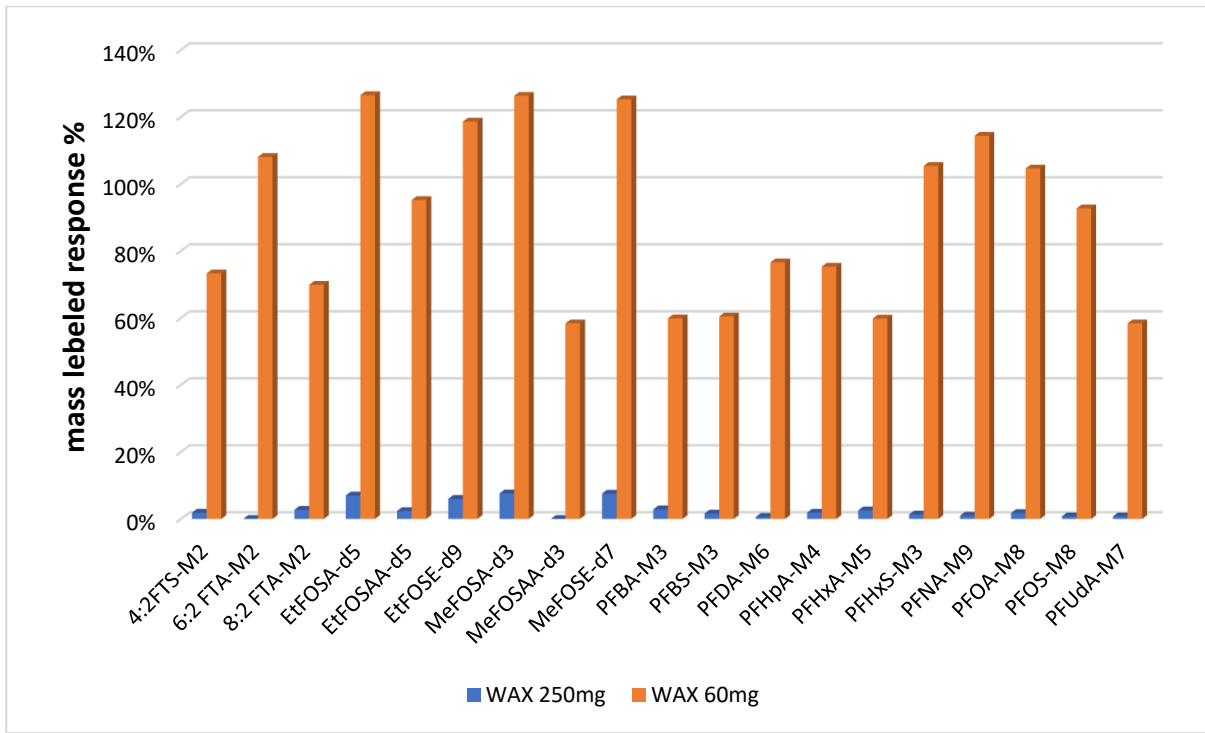

41

42 **Figure S3.** The response of 1 ng mass labeled standard in the drinking water extract extracted with different sorbent  
 43 sizes used during extraction (weak anion exchange; WAX) 250 mg and 60 mg, as compared with pure solvent

44

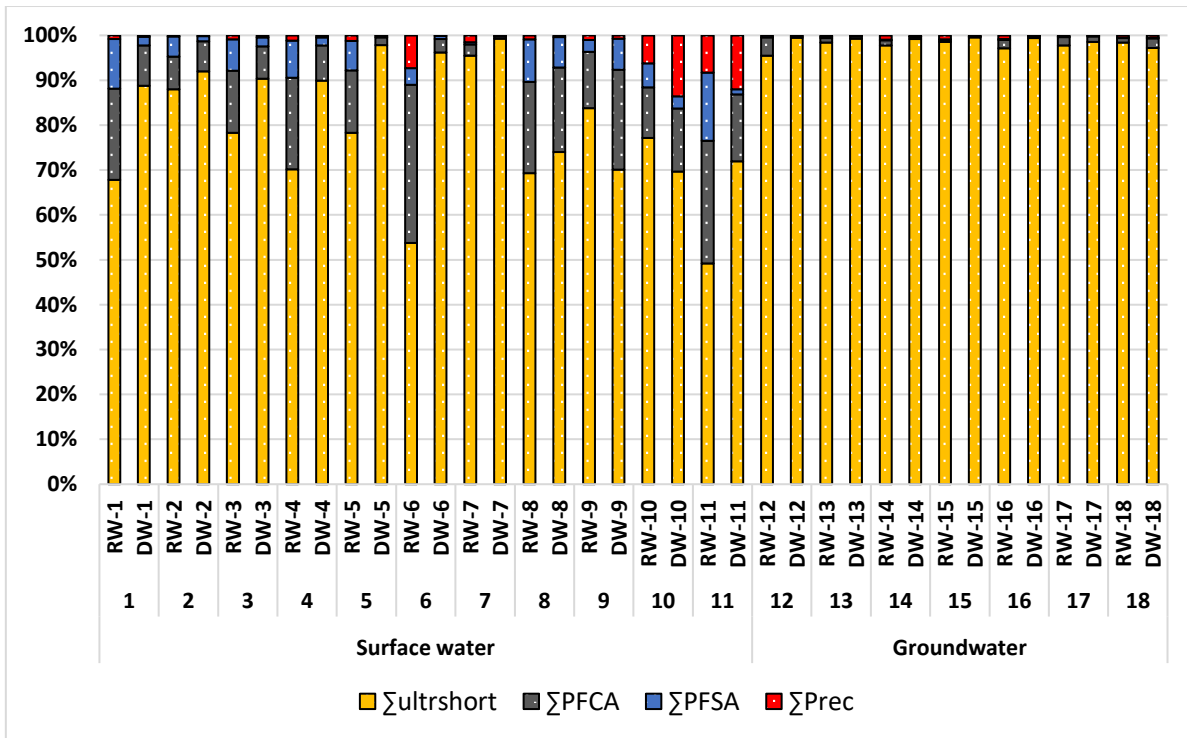

**Figure S4.** Relative contribution per PFAS class. PFAS class: ultrashort chain PFAS (C2-C3), PFCA: perfluorocarboxylic acids (C4-C14) PFSA: perfluorosulfonic acids (C4-C10), Prec: variety of precursors (C4-C24)

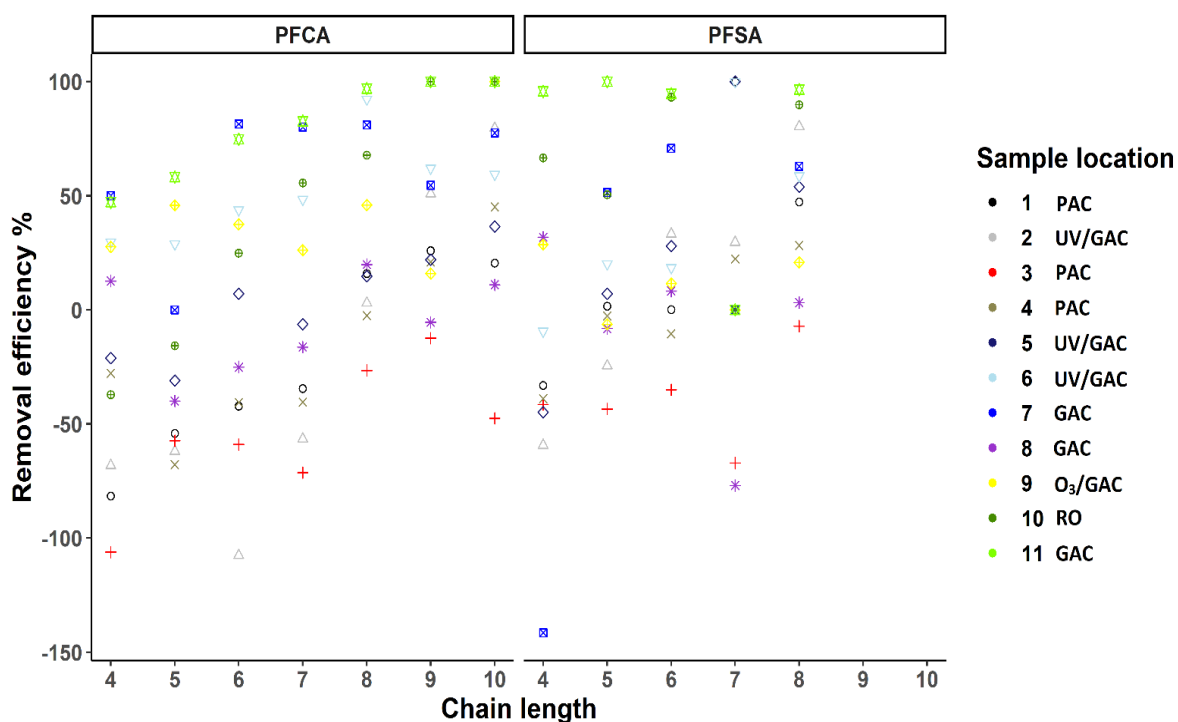

45 **Figure S5.** Removal efficiencies (%) in drinking water originated from surface water treated using advanced method (GAC,  
 46 PAC, UV/GAC, Ozone/GAC, or RO) for chain length (C4-C10) for perfluoro-carboxylic acids (PFCA) and perfluoro-sulfonic  
 47 acids (PFSA).

48 **Table S1.** Information about the analytical standards, and the method limit of detection (LOD).

| PFAS class                | Compound                             | Acronym | Formula                                         | Exact mass | Mass-labeled | Product ion                                   | LOD (ng/L) | Accuracy |
|---------------------------|--------------------------------------|---------|-------------------------------------------------|------------|--------------|-----------------------------------------------|------------|----------|
| Ultrashort chain          | Trifluoroacetic acid                 | TFA     | C <sub>2</sub> HF <sub>3</sub> O <sub>2</sub>   | 113,992867 | M4PFBA       | CF <sub>3</sub>                               | 35.44      | 78%      |
|                           | Pentafluoropropionic acid            | PFPrA   | C <sub>3</sub> HF <sub>5</sub> O <sub>2</sub>   | 163,98967  | M4PFBA       | C <sub>2</sub> F <sub>5</sub>                 | 0.23       | 80%      |
|                           | Perfluoropropanesulfonic acid        | PFPrS   | C <sub>3</sub> HF <sub>7</sub> O <sub>3</sub> S | 249,953463 | M3PFBS       | SO <sub>3</sub>                               | 0.04       | 114%     |
|                           | Potassium pentafluoroethanesulfonate | PFEtS   | C <sub>2</sub> HF <sub>5</sub> O <sub>3</sub> S | 199,95665  | M3PFBS       | SO <sub>3</sub> ; FSO <sub>3</sub>            | 0.04       | 112%     |
| perfluorocarboxylic acids | Perfluorobutyric acid                | PFBA    | C <sub>4</sub> HF <sub>7</sub> O <sub>2</sub>   | 213,986476 | M4PFBA       | C <sub>3</sub> F <sub>7</sub>                 | 0.05       | 110%     |
|                           | Perfluoropentanoic acid              | PFPeA   | C <sub>5</sub> HF <sub>9</sub> O <sub>2</sub>   | 263,983276 | M5PFPeA      | C <sub>4</sub> F <sub>9</sub>                 | 0.05       | 95%      |
|                           | Perfluorohexanoic acid               | PFHxA   | C <sub>6</sub> HF <sub>11</sub> O <sub>2</sub>  | 313,980103 | M5PFHxA      | C <sub>5</sub> F <sub>11</sub>                | 0.05       | 105%     |
|                           | Perfluoroheptanoic acid              | PFHpA   | C <sub>7</sub> HF <sub>13</sub> O <sub>2</sub>  | 363,976898 | M4PFHpA      | C <sub>6</sub> F <sub>13</sub>                | 0.05       | 101%     |
|                           | Perfluorooctanoic acid               | L-PFOA  | C <sub>8</sub> HF <sub>15</sub> O <sub>2</sub>  | 413,973694 | M8PFOA       | C <sub>8</sub> F <sub>15</sub> O <sub>2</sub> | 0.05       | 92%      |
|                           |                                      | Br-PFOA | C <sub>8</sub> HF <sub>15</sub> O <sub>3</sub>  | 413,973694 | M8PFOA       | C <sub>8</sub> F <sub>15</sub> O <sub>2</sub> | 0.05       | -        |
|                           | Perfluorononanoic acid               | PFNA    | C <sub>9</sub> HF <sub>17</sub> O <sub>2</sub>  | 463,97052  | M9PFNA       | C <sub>8</sub> F <sub>17</sub>                | 0.05       | 93%      |
|                           | Perfluorodecanoic acid               | PFDA    | C <sub>10</sub> HF <sub>19</sub> O <sub>2</sub> | 497,972412 | M6PFDA       | C <sub>9</sub> F <sub>19</sub>                | 0.05       | 90%      |
|                           | Perfluoroundecanoic acid             | PFUdA   | C <sub>11</sub> HF <sub>21</sub> O <sub>2</sub> | 563,964111 | M7PFUdA      | C <sub>10</sub> F <sub>21</sub>               | 0.05       | 83%      |

|                                                                        |                                       |                            |                                                                  |                                                                |              |            |      |      |
|------------------------------------------------------------------------|---------------------------------------|----------------------------|------------------------------------------------------------------|----------------------------------------------------------------|--------------|------------|------|------|
| perfluorosulfonic acids                                                | Perfluorododecanoic acid              | PFDoA                      | C <sub>12</sub> HF <sub>23</sub> O <sub>2</sub>                  | 613,960938                                                     | MPPDoA       | C12F23O2   | 0.05 | 86%  |
|                                                                        | Perfluorotridecanoic acid             | PFTrDA                     | C <sub>13</sub> HF <sub>25</sub> O <sub>2</sub>                  | 663,957764                                                     | M7PFUDa      | C13F25O2   | 0.05 | 82%  |
|                                                                        | Perfluorotetradecanoic acid           | PFTeDA                     | C <sub>14</sub> HF <sub>27</sub> O <sub>2</sub>                  | 713,954529                                                     | M7PFUDa      | C14F27O2   | 0.05 | 102% |
|                                                                        | Potassium perfluoro-1-butanesulfonate | PFBS                       | C <sub>4</sub> HF <sub>9</sub> O <sub>3</sub> S                  | 299,950256                                                     | M3PFBS       | FSO3;SO3   | 44   | 82%  |
|                                                                        | Sodium perfluoro-1-pentanesulfonate   | PFPeS                      | C <sub>5</sub> HF <sub>11</sub> O <sub>3</sub> S                 | 349,947083                                                     | M3PFBS       | FSO3;SO3   | 47   | 91%  |
|                                                                        | Potassium perfluorohexanesulfonate    | L-PFHxS                    | C <sub>6</sub> HF <sub>13</sub> O <sub>3</sub> S                 | 399,943878                                                     | M3PFHxS      | FSO3;SO3   | 37   | 105% |
|                                                                        |                                       | Br-PFHxS                   | C <sub>6</sub> HF <sub>13</sub> O <sub>3</sub> S                 | 399,943878                                                     | M3PFHxS      | FSO3;SO3   | 9    | 108% |
|                                                                        | Sodium perfluoro-1-heptanesulfonate   | L-PFHpS                    | C <sub>7</sub> HF <sub>15</sub> O <sub>3</sub> S                 | 449,940674                                                     | M3PFHxS      | FSO3;SO3   | 0.05 | 96%  |
|                                                                        |                                       | Br-PFHpS                   | C <sub>7</sub> HF <sub>15</sub> O <sub>3</sub> S                 | 449,940674                                                     | M3PFHxS      | FSO3;SO3   | 0.05 | -    |
|                                                                        | Potassium perfluorooctanesulfonate    | L-PFOS                     | C <sub>8</sub> HF <sub>17</sub> O <sub>3</sub> S                 | 499,9375                                                       | M8PFOS       | FSO3;SO3   | 0.04 | 108% |
|                                                                        |                                       | Br-PFOS                    | C <sub>8</sub> HF <sub>17</sub> O <sub>3</sub> S                 | 499,9375                                                       | M8PFOS       | FSO3;SO3   | 0.01 | 105% |
|                                                                        | Sodium perfluoro-1-nonanesulfonate    | PFNS                       | C <sub>9</sub> HF <sub>19</sub> O <sub>3</sub> S                 | 549,934326                                                     | M8PFOS       | FSO3;SO3   | 0.05 | 99%  |
|                                                                        | Sodium perfluoro-1-decanesulfonate    | PFDS                       | C <sub>10</sub> HF <sub>21</sub> O <sub>3</sub> S                | 599,931091                                                     | M8PFOS       | FSO3;SO3   | 0.05 | 93%  |
|                                                                        | Precursors                            | Perfluorobutylsulphonamide | FBSA                                                             | C <sub>4</sub> H <sub>2</sub> F <sub>9</sub> NO <sub>2</sub> S | 298,966248   | M3PFBS     | NO2S | 0.05 |
| Perfluorohexanesulfonamide                                             |                                       | FHxSA                      | C <sub>6</sub> H <sub>2</sub> F <sub>13</sub> NO <sub>2</sub> S  | 398,959869                                                     | M3PFHxS      | NO2S       | 0.05 | 75%  |
| Perfluorooctanesulfonamide                                             |                                       | FOSA                       | C <sub>8</sub> H <sub>2</sub> F <sub>17</sub> NO <sub>2</sub> S  | 498,953491                                                     | M8PFOS       | NO2S       | 0.05 | 85%  |
| 2,3,3,3-Tetrafluoro-2-(1,1,2,2,3,3,3-heptafluoropropoxy)propanoic acid |                                       | HFPO-DA                    | C <sub>6</sub> HF <sub>11</sub> O <sub>3</sub>                   | 329,975006                                                     | M3HFPO-DA    | C3F7       | 0.05 | 98%  |
| N-methylperfluorooctane sulfonamidoacetic acid                         |                                       | L-MeFOSAA                  | C <sub>11</sub> H <sub>6</sub> F <sub>17</sub> NO <sub>4</sub> S | 570,974609                                                     | d5-N-EtFOSAA | C8F17      | 0.04 | 93%  |
|                                                                        |                                       | Br-MeFOSAA                 | C <sub>11</sub> H <sub>6</sub> F <sub>17</sub> NO <sub>4</sub> S | 570,974609                                                     | d5-N-EtFOSAA | C8F17      | 0.02 | 84%  |
| N-ethylperfluorooctane sulfonamidoacetic acid                          |                                       | L-EtFOSAA                  | C <sub>12</sub> H <sub>8</sub> F <sub>17</sub> NO <sub>4</sub> S | 584,990234                                                     | d5-N-EtFOSAA | C8F17      | 0.04 | 95%  |
|                                                                        |                                       | Br-EtFOSAA                 | C <sub>12</sub> H <sub>8</sub> F <sub>17</sub> NO <sub>4</sub> S | 584,990234                                                     | d5-N-EtFOSAA | C8F17      | 0.01 | 93%  |
| Sodium 1H, 1 H,2H,2H-perfluoro-1-hexanesulfonate                       |                                       | 4:2FTS                     | C <sub>6</sub> H <sub>5</sub> F <sub>9</sub> O <sub>3</sub> S    | 327,981567                                                     | M2-4:2FTS    | C5H3F6     | 0.05 | 107% |
| Sodium 1 H, 1 H,2H,2H-perfluoro-1-octanesulfonate                      |                                       | 6:2FTS                     | C <sub>8</sub> H <sub>5</sub> F <sub>13</sub> O <sub>3</sub> S   | 427,975189                                                     | M2-6:2FTS    | C7HF8;C7F7 | 0.05 | 98%  |
| Sodium 1 H, 1 H,2H,2H-perfluoro-1-decanesulfonate                      |                                       | 8:2FTS                     | C <sub>10</sub> H <sub>5</sub> F <sub>17</sub> O <sub>3</sub> S  | 527,968811                                                     | M2-8:2FTS    | C9HF12     | 0.05 | 90%  |
| Sodium dodecafluoro-3H-4,8-dioxananoate                                |                                       | ADONA                      | C <sub>7</sub> H <sub>2</sub> F <sub>12</sub> O <sub>4</sub>     | 376,968322                                                     | M8PFOA       | C4F9O2     | 0.05 | 100% |
| Potassium 9-chlorohexadecafluoro-3-oxanonane-1-sulfonate               |                                       | 9Cl-PF3ONS                 | C <sub>8</sub> HCIF <sub>16</sub> O <sub>4</sub> S               | 531,902858                                                     | M8PFOA       | C8F12ClO   | 0.05 | 92%  |

|                                                                                                     |                 |                                                                                 |            |             |             |      |      |
|-----------------------------------------------------------------------------------------------------|-----------------|---------------------------------------------------------------------------------|------------|-------------|-------------|------|------|
| Potassium 11-chloroeicosafluoro-3-oxaundecane-1-sulfonate                                           | 11Cl-PF3OUDS    | C <sub>10</sub> ClF <sub>20</sub> HO <sub>4</sub> S                             | 631,896471 | M8PFOA      | C8F20ClO    | 0.05 | 96%  |
| Perfluoro-4-oxapentanoic acid                                                                       | PF4OPeA         | C <sub>4</sub> HF <sub>7</sub> O <sub>3</sub>                                   | 229,981384 | M4PFBA      | CF3O        | 0.05 | 94%  |
| Perfluoro-5-oxahexanoic acid                                                                        | PF5OHxA         | C <sub>5</sub> HF <sub>9</sub> O <sub>3</sub>                                   | 279,97821  | M3PFHxS     | CF3O        | 0.05 | 97%  |
| Perfluoro-3,6-dioxaheptanoic acid                                                                   | 3-6-OPFHpA      | C <sub>5</sub> HF <sub>9</sub> O <sub>4</sub>                                   | 295,973114 | M8PFOA      | CF3O        | 0.05 | 88%  |
| Potassium perfluoro(2-ethoxyethane)sulfonate                                                        | PFEESA          | C <sub>4</sub> F <sub>9</sub> HO <sub>4</sub> S                                 | 315,94519  | M3PFHxS     | CF3O        | 0.05 | 106% |
| Sodium 1 H, 1 H,2H,2H-perfluorododecanesulfonate                                                    | 10:2FTS         | C <sub>12</sub> H <sub>5</sub> F <sub>21</sub> O <sub>3</sub> S                 | 627,962402 | M2-8:2FTS   | C12H3F20SO3 | 0.05 | 96%  |
| N-(3-dimethylaminopropan-1-yl)perfluoro-1-hexanesulfonamide                                         | N-AP-FHxSA      | C <sub>11</sub> H <sub>13</sub> F <sub>13</sub> N <sub>2</sub> O <sub>2</sub> S | 484,049011 | M8PFOS      |             | 0.05 | 96%  |
| N-(carboxymethyl)-N,N-dimethyl-N-[3-(1H,1H,2H,2H-perfluoro-1-octanesulfonamido)propan-1-yl]ammonium | N-CMAmp-6:2FOSA | C <sub>15</sub> H <sub>19</sub> F <sub>13</sub> N <sub>2</sub> O <sub>4</sub> S | 570,085815 | M8PFOS      |             | 0.05 | 97%  |
| Potassium perfluoro-4-ethylcyclohexanesulfonate                                                     | PFECHS          | C <sub>8</sub> HF <sub>15</sub> O <sub>3</sub> S                                | 461,940674 | M8PFOA      | C8F15;FSO3  | 0.05 | 97%  |
| 3-Perfluoropropyl propanoic acid (3:3)                                                              | 4:2FTA          | C <sub>6</sub> H <sub>5</sub> F <sub>7</sub> O <sub>2</sub>                     | 242,017776 | M2-6:2FTA   |             | 0.05 | 97%  |
| 3-Perfluoropentyl propanoic acid (5:3)                                                              | 6:2FTA          | C <sub>8</sub> H <sub>5</sub> F <sub>11</sub> O <sub>2</sub>                    | 342,011383 | M2-6:2FTA   |             | 0.05 | 95%  |
| 3-Perfluoroheptyl propanoic acid (7:3)                                                              | 8:2FTA          | C <sub>10</sub> H <sub>5</sub> F <sub>15</sub> O <sub>2</sub>                   | 442,005005 | M2-8:2FTA   |             | 0.1  | 98%  |
| Sodium bis(perfluorohexyl)phosphinate                                                               | 6:6PFPI         | C <sub>12</sub> HF <sub>26</sub> O <sub>2</sub> P                               | 701,929871 | M5PFHxA     | C6F14O2P    | 0.2  | -    |
| Sodium perfluorohexylperfluorooctylphosphinate                                                      | 6:8PFPI         | C <sub>14</sub> HF <sub>30</sub> O <sub>2</sub> P                               | 801,923523 | M8PFOA      |             | 0.2  | -    |
| Sodium bis(perfluorooctyl)phosphinate                                                               | 8:8PFPI         | C <sub>16</sub> HF <sub>34</sub> O <sub>2</sub> P                               | 901,917114 | M8PFOA      |             | 0.2  | -    |
| Sodium 1H,1H,2H,2H-perfluorooctylphosphate                                                          | 6:2PAP          | C <sub>8</sub> H <sub>6</sub> F <sub>13</sub> O <sub>4</sub> P                  | 443,979614 | M8PFOA      | H2O4P       | 0.2  | -    |
| Sodium 1H,1H,2H,2H-perfluorodecylphosphate                                                          | 8:2PAP          | C <sub>10</sub> H <sub>6</sub> F <sub>17</sub> O <sub>4</sub> P                 | 543,973206 | M8PFOA      | H2O4P       | 0.2  | -    |
| Sodium bis(1H,1H,2H,2H-perfluorooctyl)phosphate                                                     | 6:2diPAP        | C <sub>16</sub> H <sub>9</sub> F <sub>26</sub> O <sub>4</sub> P                 | 789,9823   | M8PFOA      | H2O4P       | 0.2  | 72%  |
| Sodium bis(1H,1H,2H,2H-perfluorodecyl)phosphate                                                     | 8:2diPAP        | C <sub>20</sub> H <sub>9</sub> F <sub>34</sub> O <sub>4</sub> P                 | 989,969543 | M8PFOA      | C10H5F17O4P | 0.2  | -    |
| N-ethylperfluoro-1-octanesulfonamidoacetic acid                                                     | N-EtFOSA        | C <sub>10</sub> H <sub>6</sub> F <sub>17</sub> NO <sub>2</sub> S                | 526,984802 | d9-N-EtFOSE | C3F7        | 0.05 | 104% |
| N-methylperfluoro-1-octanesulfonamidoacetic acid                                                    | N-MeFOSA        | C <sub>9</sub> H <sub>4</sub> F <sub>17</sub> NO <sub>2</sub> S                 | 512,969116 | d3-N-MeFOSA | C3F7        | 0.05 | 93%  |
| 2-(N-ethylperfluoro-1-octanesulfonamido)-ethanol                                                    | N-EtFOSE        | C <sub>12</sub> H <sub>10</sub> F <sub>17</sub> NO <sub>3</sub> S               | 571,010986 | d3-N-MeFOSA | C2H3O2      | 0.05 | 98%  |

|                                                                                           |                        |                                                                                              |            |             |                                              |      |     |
|-------------------------------------------------------------------------------------------|------------------------|----------------------------------------------------------------------------------------------|------------|-------------|----------------------------------------------|------|-----|
| 2-(N-methylperfluoro-1-octanesulfonamido)-ethanol                                         | N-MeFOSE               | C <sub>11</sub> H <sub>8</sub> F <sub>17</sub> NO <sub>3</sub> S                             | 556,995361 | d9-N-EtFOSE | C <sub>2</sub> H <sub>3</sub> O <sub>2</sub> | 0.05 | 98% |
| N-(methyl) nonafluorobutanesulfonamide                                                    | MeFBSA                 | C <sub>5</sub> H <sub>4</sub> F <sub>9</sub> NO <sub>2</sub> S                               | 312,981903 | M3PFBS      | NO <sub>3</sub> S                            | 0.05 | 97% |
| Perfluoro-n-[ <sup>13</sup> C4]butanoic acid                                              | M4PFBA                 | <sup>13</sup> C <sub>4</sub> HF <sub>7</sub> O <sub>2</sub>                                  | 219,007173 |             |                                              |      |     |
| Perfluoro-n-[ <sup>13</sup> C5]pentanoic acid                                             | M5PFPeA                | <sup>13</sup> C <sub>5</sub> HF <sub>9</sub> O <sub>2</sub>                                  | 270,007334 |             |                                              |      |     |
| Perfluoro-n-[1,2,3,4,6- <sup>13</sup> C5]hexanoic acid                                    | M5PFHxA                | <sup>13</sup> C <sub>5</sub> CHF <sub>11</sub> O <sub>2</sub>                                | 320,00414  |             |                                              |      |     |
| Perfluoro-n-[1,2,3,4- <sup>13</sup> C4]heptanoic acid                                     | M4PFHpA                | <sup>13</sup> C <sub>4</sub> C <sub>3</sub> HF <sub>13</sub> O <sub>2</sub>                  | 368,997592 |             |                                              |      |     |
| Perfluoro-n-[ <sup>13</sup> C8]octanoic acid                                              | M8PFOA                 | <sup>13</sup> C <sub>8</sub> HF <sub>15</sub> O <sub>2</sub>                                 | 423,007818 |             |                                              |      |     |
| Perfluoro-n-[ <sup>13</sup> C9]nonanoic acid                                              | M9PFNA                 | <sup>13</sup> C <sub>9</sub> HF <sub>17</sub> O <sub>2</sub>                                 | 474,007979 |             |                                              |      |     |
| Perfluoro-n-[1,2,3,4,5,6- <sup>13</sup> C6]decanoic acid                                  | M6PFDA                 | <sup>13</sup> C <sub>6</sub> C <sub>4</sub> HF <sub>19</sub> O <sub>2</sub>                  | 520,994721 |             |                                              |      |     |
| Perfluoro-n-[1,2,3,4,5,6,7- <sup>13</sup> C7]undecanoic acid                              | M7PFUdA                | <sup>13</sup> C <sub>7</sub> C <sub>4</sub> HF <sub>21</sub> O <sub>2</sub>                  | 571,994882 |             |                                              |      |     |
| Perfluoro-n-[1,2- <sup>13</sup> C]dodecanoic acid                                         | MPFDoA                 | <sup>13</sup> C <sub>2</sub> C <sub>10</sub> HF <sub>23</sub> O <sub>2</sub>                 | 616,974914 |             |                                              |      |     |
| 2,3,3,3-Tetrafluoro-2-(1,1,2,2,3,3,3-heptafluoropropoxy)- <sup>13</sup> C3-propanoic acid | M3HFPO-DA              | <sup>13</sup> C <sub>3</sub> C <sub>3</sub> HF <sub>11</sub> O <sub>3</sub>                  | 333,992345 |             |                                              |      |     |
| Sodium perfluoro-1-[2,3,4- <sup>13</sup> C3]butanesulfonate                               | M3PFBS                 | <sup>13</sup> C <sub>3</sub> CHF <sub>9</sub> O <sub>3</sub> S                               | 303,96761  |             |                                              |      |     |
| Sodium perfluoro-1-[1,2,3- <sup>13</sup> C3]hexanesulfonate                               | M3PFHxS                | <sup>13</sup> C <sub>3</sub> C <sub>3</sub> H <sub>2</sub> F <sub>13</sub> O <sub>3</sub> S  | 404,969048 |             |                                              |      |     |
| Sodium perfluoro-1-[ <sup>13</sup> C8]octanesulfonate                                     | M8PFOS                 | <sup>13</sup> C <sub>8</sub> HF <sub>17</sub> O <sub>3</sub> S                               | 508,97161  |             |                                              |      |     |
| Sodium 1 H, 1 H,2H,2H-perfluoro-1-[1,2- <sup>13</sup> C2]hexanesulfonate                  | M2-4:2FTS              | <sup>13</sup> C <sub>2</sub> C <sub>4</sub> H <sub>5</sub> F <sub>9</sub> O <sub>3</sub> S   | 330,995555 |             |                                              |      |     |
| Sodium 1 H, 1 H,2H,2H-perfluoro-1-[1,2- <sup>13</sup> C2]octanesulfonate                  | M2-6:2FTS              | <sup>13</sup> C <sub>2</sub> C <sub>6</sub> H <sub>5</sub> F <sub>13</sub> O <sub>3</sub> S  | 430,989168 |             |                                              |      |     |
| Sodium 1 H, 1 H,2H,2H-perfluoro-1-[1,2- <sup>13</sup> C2]decanesulfonate                  | M2-8:2FTS              | <sup>13</sup> C <sub>2</sub> C <sub>8</sub> H <sub>5</sub> F <sub>17</sub> O <sub>3</sub> S  | 530,982781 |             |                                              |      |     |
| 2-Perfluorohexyl-[1,2- <sup>13</sup> C2]-ethanoic acid                                    | M2-6:2FTA              | <sup>13</sup> C <sub>2</sub> C <sub>6</sub> H <sub>3</sub> F <sub>13</sub> O <sub>2</sub>    | 381,006532 |             |                                              |      |     |
| 2-Perfluorooctyl-[1,2- <sup>13</sup> C2]-ethanoic acid                                    | M2-8:2FTA              | <sup>13</sup> C <sub>2</sub> C <sub>8</sub> H <sub>3</sub> F <sub>17</sub> O <sub>2</sub>    | 481,000145 |             |                                              |      |     |
| 2-Perfluorodecyl-[1,2- <sup>13</sup> C2]-ethanoic acid                                    | M2-10:2FTA             | <sup>13</sup> C <sub>2</sub> C <sub>10</sub> H <sub>3</sub> F <sub>21</sub> O <sub>2</sub>   | 580,993758 |             |                                              |      |     |
| Sodium bis(1 H, 1 H,2H,2H-[1,2- <sup>13</sup> C2]perfluorooctyl)phosphate                 | M4-6:2diPAP            | <sup>13</sup> C <sub>4</sub> C <sub>12</sub> H <sub>9</sub> F <sub>26</sub> O <sub>4</sub> P | 795,003025 |             |                                              |      |     |
| Sodium bis(1 H, 1 H,2H,2H-[1,2- <sup>13</sup> C2]perfluorodecyl)phosphate                 | M4-8:2diPAP            | <sup>13</sup> C <sub>4</sub> C <sub>16</sub> H <sub>9</sub> F <sub>34</sub> O <sub>4</sub> P | 994,990251 |             |                                              |      |     |
| N-methyl-d <sub>3</sub> -perfluoro-1-octanesulfonamide                                    | d <sub>3</sub> -MeFOSA | 2 <sup>3</sup> H <sub>3</sub> C <sub>9</sub> HF <sub>17</sub> NO <sub>2</sub> S              | 516,995236 |             |                                              |      |     |



|                    |                                                                                    |                            |                                                                                              |            |
|--------------------|------------------------------------------------------------------------------------|----------------------------|----------------------------------------------------------------------------------------------|------------|
| Injection standard | 2-(N-ethyl-d <sub>5</sub> -perfluoro-1-octanesulfonamido)ethan-d <sub>4</sub> -ol  | d <sub>9</sub> -N-EtFOSE   | <sup>2</sup> H <sub>9</sub> C <sub>12</sub> HF <sub>17</sub> NO <sub>3</sub> S               | 581,074761 |
|                    | N-Ethyl-n-perfluorooctanesulfonamidoacetic acid-d <sub>5</sub>                     | d <sub>5</sub> -N-EtFOSAA  | <sup>2</sup> H <sub>5</sub> C <sub>12</sub> H <sub>3</sub> F <sub>17</sub> NO <sub>4</sub> S | 591,028919 |
|                    | Perfluoro-n-[2,3,4- <sup>13</sup> C <sub>3</sub> ]butanoic acid                    | M3PFBA                     | <sup>13</sup> C <sub>3</sub> CHF <sub>7</sub> O <sub>2</sub>                                 | 218,003818 |
|                    | Perfluoro-n-(1,2- <sup>13</sup> C <sub>2</sub> )octanoic acid                      | M2PFOA                     | <sup>13</sup> C <sub>2</sub> C <sub>6</sub> HF <sub>15</sub> O <sub>2</sub>                  | 416,987689 |
|                    | Sodium perfluoro-1-[1,2,3,4- <sup>13</sup> C <sub>4</sub> ]octanesulfonate         | M4PFOS                     | <sup>13</sup> C <sub>4</sub> C <sub>4</sub> HF <sub>17</sub> O <sub>3</sub> S                | 504,95819  |
|                    | N-ethyl-d <sub>5</sub> -perfluoro-1-octanesulfonamide                              | d <sub>5</sub> -N-EtFOSA-M | <sup>2</sup> H <sub>5</sub> C <sub>10</sub> HF <sub>17</sub> NO <sub>2</sub> S               | 533,023439 |
|                    | 2-(N-methyl-d <sub>3</sub> -perfluoro-1-octanesulfonamido)ethan-d <sub>4</sub> -ol | d <sub>7</sub> -N-MeFOSE-M | <sup>2</sup> H <sub>7</sub> C <sub>11</sub> HF <sub>17</sub> NO <sub>3</sub> S               | 565,046558 |
|                    | N-Methyl-n-perfluorooctanesulfonamidoacetic acid-d <sub>3</sub>                    | N-MeFOSAA-d <sub>3</sub>   | <sup>2</sup> H <sub>3</sub> C <sub>11</sub> H <sub>3</sub> F <sub>17</sub> NO <sub>4</sub> S | 575,000715 |

49

50 **Table S2.** Relative potency factors (RPF) for PFAS reported in the Bil et al and Rietjens et al studies and used to  
 51 calculate the perfluorooctanoic acid equivalent (PEQ).

|                | <i>RPF (BIL ET AL., 2021)</i> | <i>RPF (BIL ET AL., 2022)</i> | <i>RPF (RIETJENS ET AL, 2021)</i> |
|----------------|-------------------------------|-------------------------------|-----------------------------------|
| <b>FBS</b>     | 0,001                         | 0,023                         | 0,008                             |
| <b>PFPEs</b>   | 0,001 ≤ RPF ≤ 0,6             | -                             | -                                 |
| <b>PFHXS</b>   | 0,6                           | 0,91                          | 0,24                              |
| <b>PFHPS</b>   | 0,6 ≤ RPF ≤ 2                 | -                             | -                                 |
| <b>PFOS</b>    | 2                             | 2,6                           | 1,5                               |
| <b>PFDS</b>    | 2                             | -                             | -                                 |
| <b>PFBA</b>    | 0,05                          | -                             | -                                 |
| <b>PFPEA</b>   | 0,01 ≤ RPF ≤ 0,05             | -                             | -                                 |
| <b>PFHXA</b>   | 0,01                          | 0,011                         | 0,003                             |
| <b>PFHPA</b>   | 0,01 ≤ RPF ≤ 1                | -                             | -                                 |
| <b>PFOA</b>    | 1                             | 1                             | 1                                 |
| <b>PFNA</b>    | 10                            | 7,2                           | 1,5                               |
| <b>PFDA</b>    | 4 ≤ RPF ≤ 10                  | 5,9                           | 2,9                               |
| <b>PFUNDA</b>  | 4                             | -                             | -                                 |
| <b>PFDODA</b>  | 3                             | -                             | -                                 |
| <b>PFTRDA</b>  | 0,3 ≤ RPF ≤ 3                 | -                             | -                                 |
| <b>PFTEDA</b>  | 0,3                           | -                             | -                                 |
| <b>PFHXDA</b>  | 0,02                          | -                             | -                                 |
| <b>PFODA</b>   | 0,02                          | -                             | -                                 |
| <b>HFPO-DA</b> | 0,06                          | -                             | -                                 |
| <b>ADONA</b>   | 0,03                          | -                             | -                                 |

52

53 **Table S3.** Results per individual PFAS and location. The concentration in ngg/L. AV, and SD represent the average  
 54 and standard deviation of the triplicate analysis, respectively.

Surface water

|             | 1      |       | 2      |      |        |       | 3      |      |        |       | 4      |      |        |       | 5      |      |         |        | 6      |      |        |       |        |      |
|-------------|--------|-------|--------|------|--------|-------|--------|------|--------|-------|--------|------|--------|-------|--------|------|---------|--------|--------|------|--------|-------|--------|------|
|             | DW-1   |       | RW-1   |      | DW-2   |       | RW-2   |      | DW-3   |       | RW-3   |      | DW-4   |       | RW-4   |      | DW-5    |        | RW-5   |      | DW-6   |       | RW-6   |      |
|             | AV     | ST    | AV     | ST   | AV     | ST    | AV     | ST   | AV     | ST    | AV     | ST   | AV     | ST    | AV     | ST   | AV      | ST     | AV     | ST   | AV     | ST    | AV     | ST   |
| TFA         | 296.24 | 10.26 | 106.07 | 0.49 | 377.42 | 26.64 | 263.88 | 3.34 | 359.86 | 17.56 | 154.60 | 1.33 | 381.44 | 19.11 | 133.90 | 1.47 | 1104.60 | 211.08 | 131.56 | 1.57 | 477.05 | 31.68 | 144.00 | 4.09 |
| PFPrA       | 63.70  | 3.84  | <LOD   | 0.00 | 41.52  | 1.45  | <LOD   | 0.00 | 65.55  | 8.19  | <LOD   | 0.00 | 64.45  | 12.15 | <LOD   | 0.00 | 16.74   | 0.70   | <LOD   | 0.00 | 22.22  | 4.96  | 1.04   | 0.14 |
| PFPrS       | 0.17   | 0.01  | 0.13   | 0.00 | 0.20   | 0.00  | 0.09   | 0.00 | 0.16   | 0.01  | 0.11   | 0.01 | 0.16   | 0.00  | 0.11   | 0.00 | 0.08    | 0.01   | 0.10   | 0.00 | 0.06   | 0.00  | 0.07   | 0.00 |
| PFETs       | <LOD   | 0.00  | <LOD   | 0.00 | <LOD   | 0.00  | <LOD   | 0.00 | <LOD   | 0.00  | <LOD   | 0.00 | <LOD   | 0.00  | <LOD   | 0.00 | <LOD    | 0.00   | <LOD   | 0.00 | <LOD   | 0.00  | <LOD   | 0.00 |
| Σultrashort | 360.11 | 0.00  | 106.20 | 0.00 | 419.14 | 0.00  | 263.97 | 0.00 | 425.57 | 0.00  | 154.71 | 0.00 | 446.04 | 0.00  | 134.01 | 0.00 | 1121.43 | 0.00   | 131.66 | 0.00 | 499.33 | 0.00  | 145.12 | 0.00 |
| PFBA        | 10.18  | 0.57  | 5.61   | 0.56 | 13.41  | 0.30  | 7.98   | 1.40 | 8.05   | 0.21  | 3.90   | 0.18 | 10.82  | 1.20  | 8.47   | 0.46 | 4.35    | 0.32   | 3.59   | 0.09 | 3.60   | 0.31  | 5.12   | 0.44 |
| PFPeA       | 6.89   | 0.39  | 4.47   | 0.11 | 3.96   | 0.03  | 2.44   | 0.18 | 5.44   | 0.13  | 3.46   | 0.06 | 6.65   | 0.40  | 3.97   | 0.18 | 4.27    | 0.24   | 3.26   | 0.09 | 3.31   | 0.27  | 4.66   | 0.32 |
| PFHxA       | 8.80   | 1.64  | 6.19   | 0.34 | 7.60   | 0.01  | 3.66   | 0.19 | 6.85   | 0.34  | 4.31   | 0.20 | 7.61   | 0.37  | 5.41   | 0.19 | 4.62    | 0.06   | 4.97   | 0.15 | 3.34   | 0.19  | 5.94   | 0.11 |
| PFHpA       | 5.68   | 0.62  | 4.22   | 0.06 | 2.59   | 0.05  | 1.66   | 0.03 | 4.74   | 0.23  | 2.76   | 0.06 | 5.05   | 0.22  | 3.59   | 0.13 | 2.63    | 0.09   | 2.47   | 0.06 | 2.01   | 0.06  | 3.90   | 0.29 |
| L-PFOA      | 3.63   | 0.07  | 4.56   | 0.07 | 2.23   | 0.06  | 2.44   | 0.05 | 6.68   | 0.05  | 5.36   | 0.12 | 7.17   | 0.35  | 7.12   | 0.42 | 3.19    | 0.12   | 3.80   | 0.15 | 2.52   | 0.10  | 32.97  | 5.69 |
| Br-PFOA     | 0.93   | 0.01  | 0.86   | 0.03 | 0.50   | 0.02  | 0.38   | 0.01 | 1.21   | 0.01  | 0.87   | 0.01 | 1.52   | 0.37  | 1.37   | 0.07 | 0.36    | 0.03   | 0.36   | 0.02 | 0.37   | 0.15  | 4.24   | 0.12 |
| ΣPFOA       | 4.55   | 0.00  | 5.42   | 0.00 | 2.73   | 0.00  | 2.82   | 0.00 | 7.89   | 0.00  | 6.23   | 0.00 | 8.70   | 0.00  | 8.48   | 0.00 | 3.55    | 0.00   | 4.17   | 0.00 | 2.89   | 0.00  | 37.21  | 0.00 |
| PFNA        | 0.30   | 0.01  | 0.40   | 0.01 | 0.20   | 0.01  | 0.41   | 0.00 | 0.40   | 0.02  | 0.35   | 0.02 | 0.26   | 0.02  | 0.33   | 0.02 | 0.36    | 0.00   | 0.47   | 0.01 | 0.29   | 0.01  | 0.75   | 0.06 |
| PFDA        | 0.17   | 0.02  | 0.22   | 0.00 | 0.05   | 0.00  | 0.24   | 0.00 | 0.30   | 0.00  | 0.21   | 0.01 | 0.15   | 0.01  | 0.27   | 0.02 | 0.18    | 0.02   | 0.28   | 0.01 | 0.14   | 0.01  | 0.34   | 0.12 |
| PFUdA       | <LOD   | 0.00  | <LOD   | 0.00 | <LOD   | 0.00  | <LOD   | 0.00 | <LOD   | 0.00  | <LOD   | 0.00 | <LOD   | 0.00  | <LOD   | 0.00 | <LOD    | 0.00   | <LOD   | 0.00 | 0.07   | 0.00  | <LOD   | 0.00 |
| PFDoA       | <LOD   | 0.00  | <LOD   | 0.00 | <LOD   | 0.00  | <LOD   | 0.00 | <LOD   | 0.00  | <LOD   | 0.00 | <LOD   | 0.00  | <LOD   | 0.00 | <LOD    | 0.00   | <LOD   | 0.00 | <LOD   | 0.00  | <LOD   | 0.00 |
| PFTTrDA     | <LOD   | 0.00  | <LOD   | 0.00 | <LOD   | 0.00  | <LOD   | 0.00 | <LOD   | 0.00  | <LOD   | 0.00 | <LOD   | 0.00  | <LOD   | 0.00 | <LOD    | 0.00   | <LOD   | 0.00 | <LOD   | 0.00  | <LOD   | 0.00 |
| PFTeDA      | <LOD   | 0.00  | <LOD   | 0.00 | <LOD   | 0.00  | <LOD   | 0.00 | <LOD   | 0.00  | <LOD   | 0.00 | <LOD   | 0.00  | <LOD   | 0.00 | <LOD    | 0.00   | <LOD   | 0.00 | <LOD   | 0.00  | <LOD   | 0.00 |
| ΣPFCA       | 36.57  | 0.00  | 31.93  | 0.00 | 30.55  | 0.00  | 22.03  | 0.00 | 33.66  | 0.00  | 27.45  | 0.00 | 39.23  | 0.00  | 38.99  | 0.00 | 19.96   | 0.00   | 23.37  | 0.00 | 15.65  | 0.00  | 95.13  | 0.00 |
| PFBS        | 2.34   | 0.12  | 1.76   | 0.04 | 3.39   | 0.06  | 2.13   | 0.01 | 2.05   | 0.07  | 1.45   | 0.05 | 2.03   | 0.03  | 1.46   | 0.06 | 1.69    | 0.04   | 1.17   | 0.01 | 1.17   | 0.04  | 1.07   | 0.04 |
| PFPeS       | 0.34   | 0.02  | 0.34   | 0.02 | 0.35   | 0.01  | 0.28   | 0.01 | 0.42   | 0.01  | 0.29   | 0.01 | 0.40   | 0.02  | 0.38   | 0.02 | 0.23    | 0.01   | 0.25   | 0.01 | 0.18   | 0.02  | 0.23   | 0.01 |
| L-PFHxS     | 1.59   | 0.03  | 1.68   | 0.01 | 0.58   | 0.02  | 1.02   | 0.01 | 2.03   | 0.05  | 1.50   | 0.04 | 2.59   | 0.09  | 2.39   | 0.09 | 0.61    | 0.03   | 0.81   | 0.01 | 0.63   | 0.21  | 0.74   | 0.02 |
| Br-PFHxS    | 0.49   | 0.01  | 0.40   | 0.01 | 0.28   | 0.01  | 0.26   | 0.01 | 0.53   | 0.01  | 0.41   | 0.01 | 0.68   | 0.01  | 0.57   | 0.03 | 0.13    | 0.01   | 0.22   | 0.00 | 0.15   | 0.08  | 0.22   | 0.01 |
| ΣPFHxS      | 2.08   | 0.00  | 2.08   | 0.00 | 0.85   | 0.00  | 1.28   | 0.00 | 2.57   | 0.00  | 1.90   | 0.00 | 3.27   | 0.00  | 2.96   | 0.00 | 0.74    | 0.00   | 1.03   | 0.00 | 0.78   | 0.00  | 0.96   | 0.00 |
| PFHpS       | <LOD   | 0.00  | 0.09   | 0.00 | 0.05   | 0.00  | 0.07   | 0.00 | 0.08   | 0.00  | 0.08   | 0.00 | 0.06   | 0.00  | 0.09   | 0.00 | <LOD    | 0.00   | 0.07   | 0.00 | <LOD   | 0.00  | 0.07   | 0.00 |
| Br-PFHpS    | <LOD   | 0.01  | 0.05   | 0.02 | <LOD   | 0.00  | <LOD   | 0.00 | 0.05   | 0.00  | <LOD   | 0.01 | 0.05   | 0.01  | 0.05   | 0.01 | <LOD    | 0.00   | <LOD   | 0.00 | <LOD   | 0.00  | <LOD   | 0.01 |

|                     |      |      |       |      |      |      |       |      |      |      |       |      |      |      |       |      |      |      |       |      |      |      |      |      |
|---------------------|------|------|-------|------|------|------|-------|------|------|------|-------|------|------|------|-------|------|------|------|-------|------|------|------|------|------|
| <i>ΣPFHpS</i>       | <LOD | 0.00 | 0.14  | 0.00 | 0.05 | 0.00 | 0.07  | 0.00 | 0.13 | 0.00 | 0.08  | 0.00 | 0.11 | 0.00 | 0.14  | 0.00 | <LOD | 0.00 | 0.07  | 0.00 | <LOD | 0.00 | 0.07 | 0.00 |
| <i>L-PFOS</i>       | 1.66 | 0.15 | 3.12  | 0.00 | 0.35 | 0.03 | 2.57  | 0.00 | 2.09 | 0.03 | 2.19  | 0.00 | 1.15 | 0.05 | 1.89  | 0.00 | 0.76 | 0.06 | 2.00  | 0.00 | 0.61 | 0.01 | 1.99 | 0.00 |
| <i>Br-PFOS</i>      | 1.17 | 0.09 | 2.26  | 0.05 | 0.46 | 0.02 | 1.52  | 0.06 | 2.22 | 0.16 | 1.83  | 0.09 | 1.64 | 0.05 | 2.00  | 0.19 | 0.93 | 0.05 | 1.67  | 0.10 | 0.75 | 0.09 | 1.30 | 0.49 |
| <i>ΣPFOS</i>        | 2.83 | 0.00 | 5.38  | 0.00 | 0.81 | 0.00 | 4.09  | 0.00 | 4.30 | 0.00 | 4.02  | 0.00 | 2.80 | 0.00 | 3.89  | 0.00 | 1.69 | 0.00 | 3.67  | 0.00 | 1.36 | 0.00 | 3.29 | 0.00 |
| <i>PFNS</i>         | <LOD | 0.00 | <LOD  | 0.00 | <LOD | 0.00 | <LOD  | 0.00 | <LOD | 0.00 | <LOD  | 0.00 | <LOD | 0.00 | <LOD  | 0.00 | <LOD | 0.00 | <LOD  | 0.06 | <LOD | 0.00 | <LOD | 0.00 |
| <i>PFDS</i>         | <LOD | 0.00 | <LOD  | 0.00 | <LOD | 0.00 | <LOD  | 0.00 | <LOD | 0.00 | <LOD  | 0.00 | <LOD | 0.00 | <LOD  | 0.00 | <LOD | 0.00 | <LOD  | 0.00 | <LOD | 0.00 | <LOD | 0.00 |
| <i>ΣPFSA</i>        | 7.67 | 0.00 | 17.31 | 0.00 | 5.45 | 0.00 | 13.34 | 0.00 | 9.46 | 0.00 | 13.80 | 0.00 | 8.60 | 0.00 | 15.83 | 0.00 | 4.37 | 0.00 | 11.02 | 0.00 | 3.49 | 0.00 | 9.97 | 0.00 |
| <i>FBSA</i>         | 0.32 | 0.03 | <LOD  | 0.00 | 0.22 | 0.00 | <LOD  | 0.00 | 0.26 | 0.00 | <LOD  | 0.00 | 0.24 | 0.01 | <LOD  | 0.00 | <LOD | 0.00 | <LOD  | 0.00 | <LOD | 0.00 | 0.13 | 0.03 |
| <i>FHxSA</i>        | <LOD | 0.00 | <LOD  | 0.00 | <LOD | 0.00 | <LOD  | 0.00 | <LOD | 0.00 | <LOD  | 0.00 | <LOD | 0.00 | <LOD  | 0.00 | <LOD | 0.00 | <LOD  | 0.00 | <LOD | 0.00 | <LOD | 0.00 |
| <i>FOSA</i>         | <LOD | 0.00 | <LOD  | 0.00 | <LOD | 0.00 | <LOD  | 0.00 | <LOD | 0.00 | <LOD  | 0.00 | <LOD | 0.00 | <LOD  | 0.00 | <LOD | 0.00 | <LOD  | 0.00 | <LOD | 0.00 | <LOD | 0.00 |
| <i>L-MeFOSAA</i>    | <LOD | 0.00 | <LOD  | 0.00 | <LOD | 0.00 | <LOD  | 0.00 | <LOD | 0.00 | <LOD  | 0.00 | <LOD | 0.00 | <LOD  | 0.00 | <LOD | 0.00 | <LOD  | 0.00 | <LOD | 0.00 | <LOD | 0.00 |
| <i>Br-MeFOSAA</i>   | <LOD | 0.00 | <LOD  | 0.00 | <LOD | 0.00 | <LOD  | 0.00 | <LOD | 0.00 | <LOD  | 0.00 | <LOD | 0.00 | <LOD  | 0.00 | <LOD | 0.00 | <LOD  | 0.00 | <LOD | 0.00 | <LOD | 0.00 |
| <i>L-EtFOSAA</i>    | <LOD | 0.00 | <LOD  | 0.00 | <LOD | 0.00 | <LOD  | 0.00 | <LOD | 0.00 | <LOD  | 0.00 | <LOD | 0.00 | <LOD  | 0.00 | <LOD | 0.00 | <LOD  | 0.00 | <LOD | 0.00 | <LOD | 0.00 |
| <i>Br-EtFOSAA</i>   | <LOD | 0.00 | <LOD  | 0.00 | <LOD | 0.00 | <LOD  | 0.00 | <LOD | 0.00 | <LOD  | 0.00 | <LOD | 0.00 | <LOD  | 0.00 | <LOD | 0.00 | <LOD  | 0.00 | <LOD | 0.00 | <LOD | 0.00 |
| <i>4:2FTS</i>       | <LOD | 0.00 | <LOD  | 0.00 | <LOD | 0.00 | <LOD  | 0.00 | <LOD | 0.00 | <LOD  | 0.00 | <LOD | 0.00 | <LOD  | 0.00 | <LOD | 0.00 | <LOD  | 0.00 | <LOD | 0.00 | <LOD | 0.00 |
| <i>6:2FTS</i>       | <LOD | 0.02 | 0.28  | 0.03 | 0.17 | 0.01 | 0.31  | 0.01 | 0.09 | 0.03 | 0.15  | 0.02 | 0.05 | 0.02 | 0.19  | 0.01 | 0.21 | 0.00 | 1.19  | 0.04 | 0.12 | 0.02 | 0.16 | 0.02 |
| <i>8:2FTS</i>       | <LOD | 0.00 | <LOD  | 0.00 | <LOD | 0.00 | <LOD  | 0.00 | <LOD | 0.00 | <LOD  | 0.00 | <LOD | 0.00 | <LOD  | 0.00 | <LOD | 0.00 | <LOD  | 0.00 | <LOD | 0.00 | <LOD | 0.00 |
| <i>ADONA</i>        | <LOD | 0.00 | <LOD  | 0.00 | <LOD | 0.00 | <LOD  | 0.00 | <LOD | 0.00 | <LOD  | 0.00 | <LOD | 0.00 | <LOD  | 0.00 | <LOD | 0.00 | <LOD  | 0.00 | <LOD | 0.00 | <LOD | 0.00 |
| <i>9Cl-PF3ONS</i>   | <LOD | 0.00 | <LOD  | 0.00 | <LOD | 0.00 | <LOD  | 0.00 | <LOD | 0.00 | <LOD  | 0.00 | <LOD | 0.00 | <LOD  | 0.00 | <LOD | 0.00 | <LOD  | 0.00 | <LOD | 0.00 | <LOD | 0.00 |
| <i>11Cl-PF3OUDS</i> | <LOD | 0.00 | <LOD  | 0.00 | <LOD | 0.00 | <LOD  | 0.00 | <LOD | 0.00 | <LOD  | 0.00 | <LOD | 0.00 | <LOD  | 0.00 | <LOD | 0.00 | <LOD  | 0.00 | <LOD | 0.00 | <LOD | 0.00 |
| <i>PF4OPeA</i>      | <LOD | 0.00 | <LOD  | 0.00 | <LOD | 0.00 | <LOD  | 0.00 | <LOD | 0.00 | <LOD  | 0.00 | <LOD | 0.00 | <LOD  | 0.00 | <LOD | 0.00 | <LOD  | 0.00 | <LOD | 0.00 | <LOD | 0.00 |
| <i>PF5OHxA</i>      | <LOD | 0.00 | <LOD  | 0.00 | <LOD | 0.00 | <LOD  | 0.00 | <LOD | 0.00 | <LOD  | 0.00 | <LOD | 0.00 | <LOD  | 0.00 | <LOD | 0.00 | <LOD  | 0.00 | <LOD | 0.00 | <LOD | 0.00 |
| <i>3-6-OPFHpA</i>   | <LOD | 0.00 | <LOD  | 0.00 | <LOD | 0.00 | <LOD  | 0.00 | <LOD | 0.00 | <LOD  | 0.00 | <LOD | 0.00 | <LOD  | 0.00 | <LOD | 0.00 | <LOD  | 0.00 | <LOD | 0.00 | <LOD | 0.00 |
| <i>PFEESA</i>       | <LOD | 0.00 | <LOD  | 0.00 | <LOD | 0.00 | <LOD  | 0.00 | <LOD | 0.00 | <LOD  | 0.00 | <LOD | 0.00 | <LOD  | 0.00 | <LOD | 0.00 | <LOD  | 0.00 | <LOD | 0.00 | <LOD | 0.00 |
| <i>10:2FTS</i>      | <LOD | 0.00 | <LOD  | 0.00 | <LOD | 0.00 | <LOD  | 0.00 | <LOD | 0.00 | <LOD  | 0.00 | <LOD | 0.00 | <LOD  | 0.00 | <LOD | 0.00 | <LOD  | 0.00 | <LOD | 0.00 | <LOD | 0.00 |
| <i>PFECHS</i>       | 0.48 | 0.01 | 0.64  | 0.06 | 0.13 | 0.00 | 0.47  | 0.04 | 1.11 | 0.00 | 1.13  | 0.03 | 1.40 | 0.05 | 1.74  | 0.14 | 0.18 | 0.01 | 0.42  | 0.02 | 0.16 | 0.02 | 0.46 | 0.03 |
| <i>4:2FTA</i>       | <LOD | 0.00 | <LOD  | 0.00 | <LOD | 0.00 | <LOD  | 0.00 | <LOD | 0.00 | <LOD  | 0.00 | <LOD | 0.00 | <LOD  | 0.00 | <LOD | 0.00 | <LOD  | 0.00 | <LOD | 0.00 | <LOD | 0.00 |
| <i>6:2FTA</i>       | <LOD | 0.00 | <LOD  | 0.00 | <LOD | 0.00 | <LOD  | 0.00 | <LOD | 0.00 | <LOD  | 0.00 | <LOD | 0.00 | <LOD  | 0.00 | <LOD | 0.00 | <LOD  | 0.00 | <LOD | 0.00 | <LOD | 0.00 |

|            |        |      |        |      |        |      |        |      |        |      |        |      |        |      |        |      |         |      |        |      |        |      |        |      |
|------------|--------|------|--------|------|--------|------|--------|------|--------|------|--------|------|--------|------|--------|------|---------|------|--------|------|--------|------|--------|------|
| 8:2FTA     | <LOD   | 0.00 | <LOD   | 0.00 | <LOD   | 0.00 | <LOD   | 0.00 | <LOD   | 0.00 | <LOD   | 0.00 | <LOD   | 0.00 | <LOD   | 0.00 | <LOD    | 0.00 | <LOD   | 0.00 | <LOD   | 0.00 | <LOD   | 0.00 |
| 6:2diPAP   | <LOD   | 0.00 | <LOD   | 0.00 | <LOD   | 0.00 | <LOD   | 0.00 | <LOD   | 0.00 | <LOD   | 0.00 | <LOD   | 0.00 | <LOD   | 0.00 | <LOD    | 0.00 | <LOD   | 0.00 | <LOD   | 0.00 | <LOD   | 0.00 |
| 6:6PPPi    | <LOD   | 0.00 | <LOD   | 0.00 | <LOD   | 0.00 | <LOD   | 0.00 | <LOD   | 0.00 | <LOD   | 0.00 | <LOD   | 0.00 | <LOD   | 0.00 | <LOD    | 0.00 | <LOD   | 0.00 | <LOD   | 0.00 | <LOD   | 0.00 |
| 8:2PAP     | <LOD   | 0.00 | <LOD   | 0.00 | <LOD   | 0.00 | <LOD   | 0.00 | <LOD   | 0.00 | <LOD   | 0.00 | <LOD   | 0.00 | <LOD   | 0.00 | <LOD    | 0.00 | <LOD   | 0.00 | <LOD   | 0.00 | <LOD   | 0.00 |
| EtFOSA     | <LOD   | 0.00 | <LOD   | 0.00 | <LOD   | 0.00 | <LOD   | 0.00 | <LOD   | 0.00 | <LOD   | 0.00 | <LOD   | 0.00 | <LOD   | 0.00 | <LOD    | 0.00 | <LOD   | 0.00 | <LOD   | 0.00 | <LOD   | 0.00 |
| MeFOSA     | <LOD   | 0.00 | <LOD   | 0.00 | <LOD   | 0.00 | <LOD   | 0.00 | <LOD   | 0.00 | <LOD   | 0.00 | <LOD   | 0.00 | <LOD   | 0.00 | <LOD    | 0.00 | <LOD   | 0.00 | <LOD   | 0.00 | <LOD   | 0.00 |
| MeFOSE     | <LOD   | 0.00 | <LOD   | 0.00 | <LOD   | 0.00 | <LOD   | 0.00 | <LOD   | 0.00 | <LOD   | 0.00 | <LOD   | 0.00 | <LOD   | 0.00 | <LOD    | 0.00 | <LOD   | 0.00 | <LOD   | 0.00 | <LOD   | 0.00 |
| EtFOSE     | <LOD   | 0.00 | <LOD   | 0.00 | <LOD   | 0.00 | <LOD   | 0.00 | <LOD   | 0.00 | <LOD   | 0.00 | <LOD   | 0.00 | <LOD   | 0.00 | <LOD    | 0.00 | <LOD   | 0.00 | <LOD   | 0.00 | <LOD   | 0.00 |
| PFHO-DA    | 0.55   | 0.00 | 0.35   | 0.00 | 0.11   | 0.00 | <LOD   | 0.00 | 0.78   | 0.00 | 0.42   | 0.00 | 0.65   | 0.00 | 0.35   | 0.00 | 0.46    | 0.00 | 0.44   | 0.00 | 0.40   | 0.00 | 19.03  | 0.00 |
| ΣPrec      | 1.39   | 0.00 | 1.26   | 0.00 | 0.63   | 0.00 | 0.78   | 0.00 | 2.24   | 0.00 | 1.70   | 0.00 | 2.35   | 0.00 | 2.27   | 0.00 | 0.87    | 0.00 | 2.05   | 0.00 | 0.69   | 0.00 | 19.78  | 0.00 |
| Total PFAS | 405.74 | 0.00 | 156.70 | 0.00 | 455.76 | 0.00 | 300.11 | 0.00 | 470.93 | 0.00 | 197.65 | 0.00 | 496.21 | 0.00 | 191.10 | 0.00 | 1146.63 | 0.00 | 168.10 | 0.00 | 519.15 | 0.00 | 270.00 | 0.00 |

Surface water

Groundwater

|            | 7      |        |        |      |        |       |        |      |       |      |        |      | 8     |       |        |      | 9     |       |       |      | 10     |       |       |      | 11 |  |  |  | 12 |  |  |  |
|------------|--------|--------|--------|------|--------|-------|--------|------|-------|------|--------|------|-------|-------|--------|------|-------|-------|-------|------|--------|-------|-------|------|----|--|--|--|----|--|--|--|
|            | DW-7   |        | RW-7   |      | DW-8   |       | RW-8   |      | DW-9  |      | RW-9   |      | DW-10 |       | RW-10  |      | DW-11 |       | RW-11 |      | DW-12  |       | RW-12 |      |    |  |  |  |    |  |  |  |
|            | AV     | ST     | AV     | ST   | AV     | ST    | AV     | ST   | AV    | ST   | AV     | ST   | AV    | ST    | AV     | ST   | AV    | ST    | AV    | ST   | AV     | ST    | AV    | ST   |    |  |  |  |    |  |  |  |
| TFA        | 645.90 | 104.13 | 641.34 | 0.35 | 94.03  | 22.71 | 126.01 | 0.42 | 33.56 | 4.05 | 189.69 | 1.53 | 44.95 | 22.74 | 135.15 | 0.00 | 54.38 | 20.12 | 82.44 | 1.94 | 134.04 | 20.02 | 87.77 | 0.11 |    |  |  |  |    |  |  |  |
| PFPrA      | <LOD   | 0.00   | <LOD   | 0.00 | 11.14  | 0.67  | 2.18   | 0.70 | <LOD  | 0.00 | <LOD   | 0.00 | 5.80  | 4.21  | <LOD   | 0.00 | 1.14  | 0.00  | <LOD  | 0.00 | 9.78   | 2.21  | 1.41  | 0.08 |    |  |  |  |    |  |  |  |
| PFPrS      | <LOD   | 0.00   | <LOD   | 0.00 | 0.14   | 0.01  | 0.07   | 0.01 | 0.08  | 0.01 | <LOD   | 0.00 | 0.09  | 0.01  | <LOD   | 0.00 | <LOD  | 0.00  | <LOD  | 0.00 | <LOD   | 0.00  | 0.07  | 0.00 |    |  |  |  |    |  |  |  |
| PFEtS      | <LOD   | 0.00   | <LOD   | 0.00 | <LOD   | 0.00  | <LOD   | 0.00 | <LOD  | 0.00 | <LOD   | 0.00 | <LOD  | 0.00  | <LOD   | 0.00 | <LOD  | 0.00  | <LOD  | 0.00 | <LOD   | 0.00  | <LOD  | 0.00 |    |  |  |  |    |  |  |  |
| Σultrshort | 645.90 | 0.00   | 641.34 | 0.00 | 105.31 | 0.00  | 128.25 | 0.00 | 33.64 | 0.00 | 189.69 | 0.00 | 50.84 | 0.00  | 135.15 | 0.00 | 55.52 | 0.00  | 82.44 | 0.00 | 143.82 | 0.00  | 89.25 | 0.00 |    |  |  |  |    |  |  |  |
| PFBA       | 1.27   | 0.01   | 2.54   | 0.45 | 12.28  | 1.12  | 14.06  | 1.53 | 3.49  | 0.71 | 4.81   | 0.56 | 4.46  | 0.57  | 3.25   | 0.00 | 7.90  | 0.38  | 14.95 | 0.00 | 0.43   | 0.26  | 2.62  | 0.29 |    |  |  |  |    |  |  |  |
| PFPeA      | 0.29   | 0.08   | <LOD   | 0.00 | 3.75   | 0.11  | 2.68   | 0.08 | 0.52  | 0.01 | 0.95   | 0.11 | 2.20  | 0.04  | 1.90   | 0.00 | 1.18  | 0.05  | 2.82  | 0.64 | <LOD   | 0.00  | 0.47  | 0.04 |    |  |  |  |    |  |  |  |
| PFHxA      | 0.30   | 0.02   | 1.64   | 0.23 | 3.03   | 0.05  | 2.42   | 0.06 | 0.75  | 0.01 | 1.20   | 0.08 | 1.23  | 0.02  | 1.63   | 0.00 | 0.68  | 0.03  | 2.69  | 0.09 | <LOD   | 0.00  | 0.39  | 0.02 |    |  |  |  |    |  |  |  |
| PFHpA      | 0.24   | 0.00   | 1.21   | 0.12 | 1.98   | 0.03  | 1.70   | 0.05 | 0.68  | 0.06 | 0.92   | 0.07 | 0.37  | 0.01  | 0.83   | 0.00 | 0.32  | 0.04  | 1.83  | 0.02 | <LOD   | 0.00  | 0.05  | 0.01 |    |  |  |  |    |  |  |  |
| L-PFOA     | 0.74   | 0.00   | 4.10   | 1.08 | 4.02   | 0.06  | 5.81   | 0.11 | 4.28  | 0.50 | 8.46   | 0.40 | 1.60  | 0.03  | 5.62   | 0.00 | 1.07  | 0.01  | 41.97 | 1.17 | 0.06   | 0.01  | 0.10  | 0.01 |    |  |  |  |    |  |  |  |
| Br-PFOA    | 0.09   | 0.00   | 0.30   | 0.01 | 1.28   | 0.30  | 0.81   | 0.01 | 0.77  | 0.07 | 0.88   | 0.01 | 0.35  | 0.01  | 0.42   | 0.00 | 0.34  | 0.01  | 3.85  | 0.12 | <LOD   | 0.01  | <LOD  | 0.00 |    |  |  |  |    |  |  |  |
| ΣPFOA      | 0.83   | 0.00   | 4.39   | 0.00 | 5.30   | 0.00  | 6.61   | 0.00 | 5.05  | 0.00 | 9.34   | 0.00 | 1.95  | 0.00  | 6.04   | 0.00 | 1.41  | 0.00  | 45.83 | 0.00 | 0.07   | 0.00  | 0.13  | 0.00 |    |  |  |  |    |  |  |  |

|                       |      |      |       |      |       |      |       |      |       |      |       |      |       |      |       |      |       |      |        |      |      |      |      |      |
|-----------------------|------|------|-------|------|-------|------|-------|------|-------|------|-------|------|-------|------|-------|------|-------|------|--------|------|------|------|------|------|
| <i>PFNA</i>           | 0.13 | 0.00 | 0.30  | 0.07 | 0.28  | 0.01 | 0.26  | 0.01 | 0.17  | 0.00 | 0.21  | 0.01 | <LOD  | 0.00 | 0.09  | 0.00 | <LOD  | 0.00 | 0.42   | 0.01 | <LOD | 0.00 | <LOD | 0.00 |
| <i>PFDA</i>           | 0.18 | 0.01 | 0.81  | 0.48 | 0.14  | 0.00 | 0.16  | 0.02 | <LOD  | 0.00 | 0.05  | 0.00 | <LOD  | 0.00 | 0.05  | 0.00 | <LOD  | 0.00 | 0.37   | 0.09 | <LOD | 0.00 | <LOD | 0.00 |
| <i>PFUdA</i>          | <LOD | 0.00 | <LOD  | 0.00 | <LOD  | 0.00 | <LOD  | 0.00 | <LOD  | 0.00 | <LOD  | 0.00 | <LOD  | 0.00 | <LOD  | 0.00 | <LOD  | 0.00 | <LOD   | 0.00 | <LOD | 0.00 | <LOD | 0.00 |
| <i>PFDoA</i>          | <LOD | 0.00 | 0.12  | 0.03 | <LOD  | 0.00 | <LOD  | 0.00 | <LOD  | 0.00 | <LOD  | 0.00 | <LOD  | 0.00 | <LOD  | 0.00 | <LOD  | 0.00 | 0.16   | 0.02 | <LOD | 0.00 | <LOD | 0.00 |
| <i>PFTrDA</i>         | <LOD | 0.00 | <LOD  | 0.00 | <LOD  | 0.00 | <LOD  | 0.00 | <LOD  | 0.00 | <LOD  | 0.00 | <LOD  | 0.00 | <LOD  | 0.00 | <LOD  | 0.00 | <LOD   | 0.00 | <LOD | 0.00 | <LOD | 0.00 |
| <i>PFTeDA</i>         | <LOD | 0.00 | 1.65  | 0.21 | <LOD  | 0.00 | 3.15  | 1.71 | <LOD  | 0.00 | 1.68  | 0.24 | <LOD  | 0.00 | <LOD  | 0.00 | <LOD  | 0.00 | <LOD   | 0.00 | <LOD | 0.00 | <LOD | 0.00 |
| $\Sigma$ <i>PFCA</i>  | 3.25 | 0.00 | 17.06 | 0.00 | 26.76 | 0.00 | 37.66 | 0.00 | 10.70 | 0.00 | 28.50 | 0.00 | 10.24 | 0.00 | 19.85 | 0.00 | 11.49 | 0.00 | 114.89 | 0.00 | 0.50 | 0.00 | 3.79 | 0.00 |
| <i>PFBS</i>           | 0.22 | 0.01 | 0.09  | 0.04 | 3.50  | 0.23 | 5.13  | 0.44 | 1.74  | 0.03 | 2.44  | 0.06 | 1.69  | 0.01 | 5.06  | 0.00 | 0.81  | 0.02 | 19.00  | 0.19 | 0.06 | 0.01 | 0.10 | 0.01 |
| <i>PFPeS</i>          | 0.09 | 0.00 | 0.18  | 0.02 | 0.38  | 0.03 | 0.35  | 0.01 | 0.19  | 0.01 | 0.18  | 0.00 | 0.09  | 0.00 | 0.18  | 0.00 | <LOD  | 0.00 | 0.62   | 0.07 | 0.09 | 0.01 | 0.17 | 0.01 |
| <i>L-PFHxS</i>        | 0.15 | 0.00 | 0.52  | 0.00 | 1.76  | 0.03 | 2.03  | 0.04 | 0.38  | 0.03 | 0.43  | 0.00 | <LOD  | 0.00 | 0.41  | 0.00 | 0.04  | 0.00 | 0.63   | 0.01 | 0.04 | 0.00 | 0.06 | 0.00 |
| <i>Br-PFHxS</i>       | 0.03 | 0.00 | 0.09  | 0.00 | 0.41  | 0.05 | 0.33  | 0.01 | 0.11  | 0.01 | 0.12  | 0.00 | <LOD  | 0.00 | 0.14  | 0.00 | <LOD  | 0.00 | 0.26   | 0.01 | <LOD | 0.00 | 0.03 | 0.00 |
| $\Sigma$ <i>PFHxS</i> | 0.18 | 0.00 | 0.61  | 0.00 | 2.17  | 0.00 | 2.36  | 0.00 | 0.49  | 0.00 | 0.55  | 0.00 | 0.04  | 0.00 | 0.55  | 0.00 | 0.05  | 0.00 | 0.88   | 0.00 | 0.05 | 0.00 | 0.09 | 0.00 |
| <i>PFHpS</i>          | <LOD | 0.00 | <LOD  | 0.00 | 0.13  | 0.05 | 0.08  | 0.00 | 0.05  | 0.05 | <LOD  | 0.00 | <LOD  | 0.00 | <LOD  | 0.00 | <LOD  | 0.00 | <LOD   | 0.00 | <LOD | 0.00 | <LOD | 0.00 |
| <i>Br-PFHpS</i>       | <LOD | 0.00 | <LOD  | 0.00 | <LOD  | 0.00 | <LOD  | 0.01 | <LOD  | 0.00 | <LOD  | 0.00 | <LOD  | 0.00 | <LOD  | 0.00 | <LOD  | 0.00 | <LOD   | 0.00 | <LOD | 0.00 | <LOD | 0.00 |
| $\Sigma$ <i>PFHpS</i> | <LOD | 0.00 | <LOD  | 0.00 | 0.13  | 0.00 | 0.08  | 0.00 | 0.05  | 0.00 | <LOD  | 0.00 | <LOD  | 0.00 | <LOD  | 0.00 | <LOD  | 0.00 | <LOD   | 0.00 | <LOD | 0.00 | <LOD | 0.00 |
| <i>L-PFOS</i>         | 0.13 | 0.00 | 0.46  | 0.00 | 1.62  | 0.07 | 2.25  | 0.00 | 0.37  | 0.20 | 0.54  | 0.00 | 0.05  | 0.01 | 0.71  | 0.00 | 0.04  | 0.02 | 0.79   | 0.02 | <LOD | 0.01 | <LOD | 0.00 |
| <i>Br-PFOS</i>        | 0.20 | 0.00 | 0.42  | 0.09 | 1.86  | 0.36 | 1.34  | 0.25 | 0.50  | 0.04 | 0.56  | 0.03 | 0.10  | 0.02 | 0.76  | 0.00 | 0.03  | 0.01 | 1.05   | 0.02 | <LOD | 0.00 | <LOD | 0.00 |
| $\Sigma$ <i>PFOS</i>  | 0.33 | 0.00 | 0.88  | 0.00 | 3.48  | 0.00 | 3.59  | 0.00 | 0.87  | 0.00 | 1.10  | 0.00 | 0.15  | 0.00 | 1.47  | 0.00 | 0.06  | 0.00 | 1.84   | 0.00 | <LOD | 0.00 | <LOD | 0.00 |
| <i>PFNS</i>           | <LOD | 0.00 | <LOD  | 0.00 | <LOD  | 0.00 | <LOD  | 0.00 | <LOD  | 0.00 | <LOD  | 0.00 | <LOD  | 0.00 | <LOD  | 0.00 | <LOD  | 0.00 | <LOD   | 0.00 | <LOD | 0.00 | <LOD | 0.00 |
| <i>PFDS</i>           | <LOD | 0.00 | <LOD  | 0.00 | <LOD  | 0.00 | <LOD  | 0.00 | <LOD  | 0.00 | <LOD  | 0.00 | <LOD  | 0.00 | <LOD  | 0.00 | <LOD  | 0.00 | <LOD   | 0.00 | <LOD | 0.00 | <LOD | 0.00 |
| $\Sigma$ <i>PFSA</i>  | 0.81 | 0.00 | 3.25  | 0.00 | 9.66  | 0.00 | 17.54 | 0.00 | 3.34  | 0.00 | 5.92  | 0.00 | 1.97  | 0.00 | 9.27  | 0.00 | 0.92  | 0.00 | 25.07  | 0.00 | 0.23 | 0.00 | 0.46 | 0.00 |
| <i>FBSA</i>           | <LOD | 0.00 | <LOD  | 0.00 | <LOD  | 0.00 | <LOD  | 0.00 | <LOD  | 0.02 | <LOD  | 0.00 | <LOD  | 0.01 | <LOD  | 0.00 | <LOD  | 0.00 | <LOD   | 0.00 | <LOD | 0.00 | <LOD | 0.00 |
| <i>FHxSA</i>          | <LOD | 0.00 | <LOD  | 0.00 | <LOD  | 0.00 | <LOD  | 0.00 | <LOD  | 0.00 | <LOD  | 0.00 | <LOD  | 0.00 | <LOD  | 0.00 | <LOD  | 0.00 | <LOD   | 0.00 | <LOD | 0.00 | <LOD | 0.00 |
| <i>FOSA</i>           | <LOD | 0.00 | <LOD  | 0.00 | <LOD  | 0.00 | <LOD  | 0.00 | <LOD  | 0.00 | <LOD  | 0.00 | <LOD  | 0.00 | <LOD  | 0.00 | <LOD  | 0.00 | <LOD   | 0.00 | <LOD | 0.00 | <LOD | 0.00 |
| <i>L-MeFOSAA</i>      | <LOD | 0.00 | <LOD  | 0.00 | <LOD  | 0.00 | <LOD  | 0.00 | <LOD  | 0.00 | <LOD  | 0.00 | <LOD  | 0.00 | <LOD  | 0.00 | <LOD  | 0.00 | <LOD   | 0.00 | <LOD | 0.00 | <LOD | 0.00 |
| <i>Br-MeFOSAA</i>     | <LOD | 0.00 | <LOD  | 0.00 | <LOD  | 0.00 | <LOD  | 0.00 | <LOD  | 0.00 | <LOD  | 0.00 | <LOD  | 0.00 | <LOD  | 0.00 | <LOD  | 0.00 | 0.11   | 0.01 | <LOD | 0.00 | <LOD | 0.00 |
| <i>L-EtFOSAA</i>      | <LOD | 0.00 | <LOD  | 0.00 | <LOD  | 0.00 | <LOD  | 0.00 | <LOD  | 0.00 | <LOD  | 0.00 | <LOD  | 0.00 | 0.07  | 0.00 | <LOD  | 0.00 | 0.32   | 0.03 | <LOD | 0.00 | <LOD | 0.00 |
| <i>Br-EtFOSAA</i>     | <LOD | 0.00 | <LOD  | 0.00 | <LOD  | 0.00 | <LOD  | 0.00 | <LOD  | 0.00 | <LOD  | 0.00 | <LOD  | 0.00 | 0.13  | 0.00 | <LOD  | 0.00 | 0.47   | 0.03 | <LOD | 0.00 | <LOD | 0.00 |
| <i>4:2FTS</i>         | <LOD | 0.00 | <LOD  | 0.00 | <LOD  | 0.00 | <LOD  | 0.00 | <LOD  | 0.00 | <LOD  | 0.00 | <LOD  | 0.00 | <LOD  | 0.00 | <LOD  | 0.00 | <LOD   | 0.00 | <LOD | 0.00 | <LOD | 0.00 |

|                  |        |      |        |      |        |      |        |      |       |      |        |      |       |      |        |      |       |      |        |      |        |      |       |      |
|------------------|--------|------|--------|------|--------|------|--------|------|-------|------|--------|------|-------|------|--------|------|-------|------|--------|------|--------|------|-------|------|
| 6:2FTS           | <LOD   | 0.00 | <LOD   | 0.00 | <LOD   | 0.01 | 0.28   | 0.02 | <LOD  | 0.00 | 0.17   | 0.02 | <LOD  | 0.01 | 0.26   | 0.00 | <LOD  | 0.00 | 0.68   | 0.05 | <LOD   | 0.00 | <LOD  | 0.00 |
| 8:2FTS           | 0.17   | 0.00 | 1.58   | 0.39 | <LOD   | 0.00 | <LOD   | 0.00 | <LOD  | 0.00 | <LOD   | 0.00 | <LOD  | 0.00 | 0.08   | 0.00 | <LOD  | 0.00 | 0.42   | 0.04 | <LOD   | 0.00 | <LOD  | 0.00 |
| ADONA            | <LOD   | 0.00 | <LOD   | 0.00 | <LOD   | 0.00 | <LOD   | 0.00 | <LOD  | 0.00 | <LOD   | 0.00 | <LOD  | 0.00 | <LOD   | 0.00 | <LOD  | 0.00 | 0.20   | 0.00 | <LOD   | 0.00 | <LOD  | 0.00 |
| 9Cl-<br>PF3ONS   | <LOD   | 0.00 | <LOD   | 0.00 | <LOD   | 0.00 | <LOD   | 0.00 | <LOD  | 0.00 | <LOD   | 0.00 | <LOD  | 0.00 | <LOD   | 0.00 | <LOD  | 0.00 | <LOD   | 0.00 | <LOD   | 0.00 | <LOD  | 0.00 |
| 11Cl-<br>PF3OUDS | <LOD   | 0.00 | <LOD   | 0.00 | <LOD   | 0.00 | <LOD   | 0.00 | <LOD  | 0.00 | <LOD   | 0.00 | <LOD  | 0.00 | <LOD   | 0.00 | <LOD  | 0.00 | <LOD   | 0.00 | <LOD   | 0.00 | <LOD  | 0.00 |
| PF4OPeA          | <LOD   | 0.00 | <LOD   | 0.00 | <LOD   | 0.00 | <LOD   | 0.00 | <LOD  | 0.00 | <LOD   | 0.00 | <LOD  | 0.00 | <LOD   | 0.00 | <LOD  | 0.00 | <LOD   | 0.00 | <LOD   | 0.00 | <LOD  | 0.00 |
| PF5OHxA          | <LOD   | 0.00 | <LOD   | 0.00 | <LOD   | 0.00 | <LOD   | 0.00 | <LOD  | 0.00 | <LOD   | 0.00 | <LOD  | 0.00 | <LOD   | 0.00 | <LOD  | 0.00 | <LOD   | 0.00 | <LOD   | 0.00 | <LOD  | 0.00 |
| 3-6-<br>OPFHpA   | <LOD   | 0.00 | <LOD   | 0.00 | <LOD   | 0.00 | <LOD   | 0.00 | <LOD  | 0.00 | <LOD   | 0.00 | <LOD  | 0.00 | <LOD   | 0.00 | <LOD  | 0.02 | <LOD   | 0.00 | <LOD   | 0.00 | <LOD  | 0.00 |
| PFEEsA           | <LOD   | 0.00 | <LOD   | 0.00 | <LOD   | 0.00 | <LOD   | 0.00 | <LOD  | 0.00 | <LOD   | 0.00 | <LOD  | 0.00 | <LOD   | 0.00 | <LOD  | 0.00 | <LOD   | 0.00 | <LOD   | 0.00 | <LOD  | 0.00 |
| 10:2FTS          | 0.31   | 0.06 | 4.93   | 1.04 | <LOD   | 0.00 | <LOD   | 0.00 | <LOD  | 0.00 | <LOD   | 0.00 | <LOD  | 0.00 | 0.07   | 0.00 | <LOD  | 0.00 | <LOD   | 0.00 | <LOD   | 0.00 | <LOD  | 0.00 |
| PFECHS           | 0.06   | 0.00 | 0.15   | 0.00 | 0.52   | 0.09 | 0.56   | 0.05 | 0.29  | 0.03 | 0.56   | 0.01 | <LOD  | 0.00 | 0.14   | 0.00 | 0.06  | 0.00 | 0.23   | 0.01 | <LOD   | 0.00 | <LOD  | 0.00 |
| 4:2FTA           | <LOD   | 0.00 | <LOD   | 0.00 | <LOD   | 0.00 | <LOD   | 0.00 | <LOD  | 0.00 | <LOD   | 0.00 | <LOD  | 0.00 | <LOD   | 0.00 | <LOD  | 0.00 | <LOD   | 0.00 | <LOD   | 0.00 | <LOD  | 0.00 |
| 6:2FTA           | <LOD   | 0.00 | <LOD   | 0.00 | <LOD   | 0.00 | <LOD   | 0.00 | <LOD  | 0.00 | <LOD   | 0.00 | <LOD  | 0.00 | <LOD   | 0.00 | <LOD  | 0.00 | <LOD   | 0.00 | <LOD   | 0.00 | <LOD  | 0.00 |
| 8:2FTA           | <LOD   | 0.00 | <LOD   | 0.00 | <LOD   | 0.00 | <LOD   | 0.00 | <LOD  | 0.00 | <LOD   | 0.00 | <LOD  | 0.00 | <LOD   | 0.00 | <LOD  | 0.00 | <LOD   | 0.00 | <LOD   | 0.00 | <LOD  | 0.00 |
| 6:2diPAP         | <LOD   | 0.00 | <LOD   | 0.00 | <LOD   | 0.00 | <LOD   | 0.00 | <LOD  | 0.00 | <LOD   | 0.00 | <LOD  | 0.00 | <LOD   | 0.00 | <LOD  | 0.00 | <LOD   | 0.00 | <LOD   | 0.00 | <LOD  | 0.00 |
| 6:6PFPi          | <LOD   | 0.00 | 2.51   | 0.22 | <LOD   | 0.00 | 0.79   | 0.02 | <LOD  | 0.00 | 1.44   | 0.05 | <LOD  | 0.00 | 0.62   | 0.00 | <LOD  | 0.00 | <LOD   | 0.00 | <LOD   | 0.00 | <LOD  | 0.00 |
| 8:2PAP           | <LOD   | 0.00 | <LOD   | 0.00 | <LOD   | 0.00 | <LOD   | 0.00 | <LOD  | 0.00 | <LOD   | 0.00 | <LOD  | 0.00 | <LOD   | 0.00 | <LOD  | 0.00 | <LOD   | 0.00 | <LOD   | 0.00 | <LOD  | 0.00 |
| EtFOSA           | <LOD   | 0.00 | 0.97   | 0.10 | <LOD   | 0.00 | <LOD   | 0.00 | <LOD  | 0.00 | <LOD   | 0.00 | <LOD  | 0.00 | <LOD   | 0.00 | <LOD  | 0.00 | <LOD   | 0.00 | <LOD   | 0.00 | <LOD  | 0.00 |
| MeFOSA           | <LOD   | 0.00 | <LOD   | 0.00 | <LOD   | 0.00 | <LOD   | 0.00 | <LOD  | 0.00 | <LOD   | 0.00 | <LOD  | 0.00 | <LOD   | 0.00 | <LOD  | 0.00 | <LOD   | 0.00 | <LOD   | 0.00 | <LOD  | 0.00 |
| MeFOSE           | <LOD   | 0.00 | <LOD   | 0.00 | <LOD   | 0.00 | <LOD   | 0.00 | <LOD  | 0.00 | <LOD   | 0.00 | <LOD  | 0.00 | <LOD   | 0.00 | <LOD  | 0.00 | <LOD   | 0.00 | <LOD   | 0.00 | <LOD  | 0.00 |
| EtFOSE           | <LOD   | 0.00 | <LOD   | 0.00 | <LOD   | 0.00 | <LOD   | 0.00 | <LOD  | 0.00 | <LOD   | 0.00 | <LOD  | 0.00 | <LOD   | 0.00 | <LOD  | 0.00 | <LOD   | 0.00 | <LOD   | 0.00 | <LOD  | 0.00 |
| PFHO-DA          | <LOD   | 0.00 | <LOD   | 0.00 | <LOD   | 0.00 | <LOD   | 0.00 | <LOD  | 0.00 | 0.19   | 0.00 | 9.83  | 0.00 | 9.60   | 0.00 | <LOD  | 0.00 | <LOD   | 0.00 | <LOD   | 0.00 | <LOD  | 0.00 |
| ΣPrec            | 0.54   | 0.00 | 10.14  | 0.00 | 0.54   | 0.00 | 1.63   | 0.00 | 0.34  | 0.00 | 2.36   | 0.00 | 9.90  | 0.00 | 10.98  | 0.00 | 0.25  | 0.00 | 2.43   | 0.00 | <LOD   | 0.00 | <LOD  | 0.00 |
| Total PFAS       | 650.51 | 0.00 | 671.79 | 0.00 | 142.27 | 0.00 | 185.09 | 0.00 | 48.02 | 0.00 | 226.47 | 0.00 | 72.95 | 0.00 | 175.25 | 0.00 | 68.18 | 0.00 | 224.83 | 0.00 | 144.56 | 0.00 | 93.50 | 0.00 |

Groundwater

|                   | 13     |        | 14     |      |        |      | 15     |      |        |       | 16     |      |       |      | 17     |      |        |       | 18     |      |       |      |        |      |
|-------------------|--------|--------|--------|------|--------|------|--------|------|--------|-------|--------|------|-------|------|--------|------|--------|-------|--------|------|-------|------|--------|------|
|                   | DW-13  |        | RW-13  |      | DW-14  |      | RW-14  |      | DW-15  |       | RW-15  |      | DW-16 |      | RW-16  |      | DW-17  |       | RW-17  |      | DW-18 |      | RW-18  |      |
|                   | AV     | ST     | AV     | ST   | AV     | ST   | AV     | ST   | AV     | ST    | AV     | ST   | AV    | ST   | AV     | ST   | AV     | ST    | AV     | ST   | AV    | ST   | AV     | ST   |
| <i>TFA</i>        | 482.95 | 124.32 | 520.93 | 6.28 | 384.88 | 9.94 | 388.15 | 1.93 | 438.09 | 63.03 | 483.63 | 0.19 | 98.19 | 3.25 | 204.46 | 0.92 | 90.58  | 12.61 | 352.49 | 8.04 | 88.44 | 0.07 | 133.73 | 1.14 |
| <i>PFPrA</i>      | <LOD   | 0.00   | <LOD   | 0.00 | <LOD   | 0.00 | <LOD   | 0.00 | <LOD   | 0.00  | <LOD   | 0.00 | <LOD  | 0.00 | 4.90   | 1.96 | 28.39  | 0.69  | 11.13  | 1.18 | 8.99  | 1.27 | 1.67   | 0.33 |
| <i>PFPrS</i>      | <LOD   | 0.00   | <LOD   | 0.00 | <LOD   | 0.00 | <LOD   | 0.00 | <LOD   | 0.00  | <LOD   | 0.00 | <LOD  | 0.00 | <LOD   | 0.00 | <LOD   | 0.00  | <LOD   | 0.00 | <LOD  | 0.00 | <LOD   | 0.00 |
| <i>PFETs</i>      | <LOD   | 0.00   | <LOD   | 0.00 | <LOD   | 0.00 | <LOD   | 0.00 | <LOD   | 0.00  | <LOD   | 0.00 | <LOD  | 0.00 | <LOD   | 0.00 | <LOD   | 0.00  | <LOD   | 0.00 | <LOD  | 0.00 | <LOD   | 0.00 |
| <i>Σultrshort</i> | 482.95 | 0.00   | 520.93 | 0.00 | 384.88 | 0.00 | 388.15 | 0.00 | 438.09 | 0.00  | 483.63 | 0.00 | 98.19 | 0.00 | 209.36 | 0.00 | 118.97 | 0.00  | 363.62 | 0.00 | 97.43 | 0.00 | 135.40 | 0.00 |
| <i>PFBA</i>       | 0.40   | 0.01   | 1.04   | 0.00 | 0.31   | 0.07 | <LOD   | 0.00 | 0.13   | 0.03  | <LOD   | 0.00 | 0.30  | 0.01 | 1.22   | 0.20 | 1.17   | 0.03  | 3.69   | 0.31 | 0.97  | 0.04 | 0.84   | 0.05 |
| <i>PFPeA</i>      | 0.23   | 0.02   | 0.54   | 0.04 | 0.19   | 0.02 | <LOD   | 0.00 | 0.10   | 0.01  | 0.31   | 0.01 | <LOD  | 0.00 | 0.25   | 0.07 | <LOD   | 0.00  | 0.33   | 0.04 | 0.30  | 0.01 | <LOD   | 0.00 |
| <i>PFHxA</i>      | 0.35   | 0.01   | 0.54   | 0.01 | 0.24   | 0.01 | 0.40   | 0.04 | 0.15   | 0.01  | 0.41   | 0.10 | <LOD  | 0.00 | 0.40   | 0.07 | <LOD   | 0.00  | 0.44   | 0.10 | 0.23  | 0.01 | 0.19   | 0.01 |
| <i>PFHpA</i>      | 0.22   | 0.00   | 0.32   | 0.01 | 0.16   | 0.01 | 0.23   | 0.02 | 0.11   | 0.00  | 0.21   | 0.04 | <LOD  | 0.00 | 0.26   | 0.07 | <LOD   | 0.00  | 0.33   | 0.13 | 0.10  | 0.00 | <LOD   | 0.00 |
| <i>L-PFOA</i>     | 0.87   | 0.01   | 1.27   | 0.01 | 0.61   | 0.00 | 1.24   | 0.11 | 0.34   | 0.05  | 0.67   | 0.28 | 0.10  | 0.01 | 0.69   | 0.25 | 0.28   | 0.02  | 0.84   | 0.07 | 0.35  | 0.02 | 0.16   | 0.02 |
| <i>Br-PFOA</i>    | 0.15   | 0.01   | 0.20   | 0.01 | 0.06   | 0.00 | <LOD   | 0.00 | 0.05   | 0.01  | 0.08   | 0.01 | <LOD  | 0.00 | <LOD   | 0.00 | 0.06   | 0.01  | 0.14   | 0.00 | <LOD  | 0.00 | <LOD   | 0.00 |
| <i>ΣPFOA</i>      | 1.03   | 0.00   | 1.47   | 0.00 | 0.68   | 0.00 | 1.27   | 0.00 | 0.39   | 0.00  | 0.75   | 0.00 | 0.13  | 0.00 | 0.73   | 0.00 | 0.34   | 0.00  | 0.97   | 0.00 | 0.36  | 0.00 | 0.19   | 0.00 |
| <i>PFNA</i>       | 0.09   | 0.00   | 0.10   | 0.00 | 0.08   | 0.00 | 0.05   | 0.01 | <LOD   | 0.00  | <LOD   | 0.00 | <LOD  | 0.00 | <LOD   | 0.02 | <LOD   | 0.00  | <LOD   | 0.00 | 0.06  | 0.00 | <LOD   | 0.00 |
| <i>PFDA</i>       | 0.08   | 0.00   | <LOD   | 0.00 | 0.28   | 0.00 | 0.64   | 0.05 | 0.15   | 0.00  | 0.18   | 0.08 | <LOD  | 0.00 | 0.40   | 0.17 | <LOD   | 0.00  | 0.07   | 0.01 | 0.13  | 0.01 | <LOD   | 0.00 |
| <i>PFUdA</i>      | <LOD   | 0.00   | <LOD   | 0.00 | <LOD   | 0.00 | 0.07   | 0.00 | <LOD   | 0.00  | <LOD   | 0.00 | <LOD  | 0.00 | <LOD   | 0.00 | <LOD   | 0.00  | <LOD   | 0.00 | <LOD  | 0.00 | <LOD   | 0.00 |
| <i>PFDoA</i>      | <LOD   | 0.00   | <LOD   | 0.00 | <LOD   | 0.01 | 0.09   | 0.00 | <LOD   | 0.00  | <LOD   | 0.01 | <LOD  | 0.00 | 0.05   | 0.05 | <LOD   | 0.00  | <LOD   | 0.00 | <LOD  | 0.00 | <LOD   | 0.00 |
| <i>PFTrDA</i>     | <LOD   | 0.00   | <LOD   | 0.00 | <LOD   | 0.00 | <LOD   | 0.00 | <LOD   | 0.00  | <LOD   | 0.00 | <LOD  | 0.00 | <LOD   | 0.00 | <LOD   | 0.00  | <LOD   | 0.00 | <LOD  | 0.00 | <LOD   | 0.00 |
| <i>PFTeDA</i>     | <LOD   | 0.00   | <LOD   | 0.00 | <LOD   | 0.00 | 0.55   | 0.05 | <LOD   | 0.00  | <LOD   | 0.00 | <LOD  | 0.00 | <LOD   | 0.00 | <LOD   | 0.00  | <LOD   | 0.00 | <LOD  | 0.00 | <LOD   | 0.00 |
| <i>ΣPFCA</i>      | 2.39   | 0.00   | 5.47   | 0.00 | 1.97   | 0.00 | 4.57   | 0.00 | 1.03   | 0.00  | 2.61   | 0.00 | 0.44  | 0.00 | 4.02   | 0.00 | 1.51   | 0.00  | 6.80   | 0.00 | 2.17  | 0.00 | 1.41   | 0.00 |
| <i>PFBS</i>       | 0.12   | 0.00   | <LOD   | 0.00 | <LOD   | 0.00 | <LOD   | 0.00 | <LOD   | 0.00  | <LOD   | 0.00 | 0.05  | 0.00 | <LOD   | 0.00 | 0.07   | 0.00  | <LOD   | 0.00 | <LOD  | 0.00 | <LOD   | 0.00 |
| <i>PFPeS</i>      | 0.08   | 0.00   | 0.07   | 0.00 | 0.05   | 0.00 | <LOD   | 0.00 | <LOD   | 0.03  | <LOD   | 0.00 | <LOD  | 0.00 | <LOD   | 0.00 | <LOD   | 0.00  | 0.08   | 0.00 | <LOD  | 0.00 | <LOD   | 0.00 |
| <i>L-PFHxS</i>    | 0.04   | 0.00   | 0.07   | 0.00 | <LOD   | 0.00 | <LOD   | 0.00 | <LOD   | 0.00  | <LOD   | 0.00 | <LOD  | 0.00 | <LOD   | 0.00 | <LOD   | 0.00  | <LOD   | 0.00 | <LOD  | 0.00 | <LOD   | 0.00 |
| <i>Br-PFHxS</i>   | <LOD   | 0.00   | 0.04   | 0.00 | <LOD   | 0.00 | <LOD   | 0.00 | <LOD   | 0.00  | <LOD   | 0.00 | <LOD  | 0.00 | <LOD   | 0.00 | <LOD   | 0.00  | <LOD   | 0.00 | <LOD  | 0.00 | <LOD   | 0.00 |
| <i>ΣPFHxS</i>     | 0.06   | 0.00   | 0.11   | 0.00 | <LOD   | 0.00 | <LOD   | 0.00 | <LOD   | 0.00  | <LOD   | 0.00 | <LOD  | 0.00 | <LOD   | 0.00 | <LOD   | 0.00  | <LOD   | 0.00 | <LOD  | 0.00 | <LOD   | 0.00 |
| <i>PFHpS</i>      | <LOD   | 0.00   | <LOD   | 0.00 | <LOD   | 0.00 | <LOD   | 0.00 | <LOD   | 0.00  | <LOD   | 0.00 | <LOD  | 0.00 | <LOD   | 0.00 | <LOD   | 0.00  | <LOD   | 0.00 | <LOD  | 0.00 | <LOD   | 0.00 |
| <i>Br-PFHpS</i>   | <LOD   | 0.00   | <LOD   | 0.00 | <LOD   | 0.00 | <LOD   | 0.00 | <LOD   | 0.00  | <LOD   | 0.00 | <LOD  | 0.00 | <LOD   | 0.00 | <LOD   | 0.00  | <LOD   | 0.00 | <LOD  | 0.00 | <LOD   | 0.00 |

|                     |      |      |      |      |      |      |      |      |      |      |      |      |      |      |      |      |      |      |      |      |      |      |      |      |
|---------------------|------|------|------|------|------|------|------|------|------|------|------|------|------|------|------|------|------|------|------|------|------|------|------|------|
| <i>ΣPFHpS</i>       | <LOD | 0.00 | <LOD | 0.00 | <LOD | 0.00 | <LOD | 0.00 | <LOD | 0.00 | <LOD | 0.00 | <LOD | 0.00 | <LOD | 0.00 | <LOD | 0.00 | <LOD | 0.00 | <LOD | 0.00 | <LOD | 0.00 |
| <i>L-PFOS</i>       | 0.12 | 0.01 | 0.24 | 0.00 | 0.08 | 0.00 | 0.10 | 0.00 | 0.09 | 0.02 | 0.05 | 0.00 | 0.04 | 0.01 | 0.11 | 0.00 | 0.06 | 0.02 | 0.05 | 0.00 | 0.05 | 0.00 | <LOD | 0.00 |
| <i>Br-PFOS</i>      | 0.17 | 0.00 | 0.31 | 0.01 | 0.09 | 0.00 | 0.09 | 0.00 | 0.08 | 0.01 | 0.07 | 0.02 | 0.02 | 0.01 | 0.10 | 0.03 | 0.06 | 0.02 | 0.11 | 0.01 | 0.02 | 0.00 | 0.06 | 0.00 |
| <i>ΣPFOS</i>        | 0.29 | 0.00 | 0.54 | 0.00 | 0.16 | 0.00 | 0.20 | 0.00 | 0.17 | 0.00 | 0.13 | 0.00 | 0.06 | 0.00 | 0.21 | 0.00 | 0.12 | 0.00 | 0.16 | 0.00 | 0.07 | 0.00 | 0.06 | 0.00 |
| <i>PFNS</i>         | <LOD | 0.00 | <LOD | 0.00 | <LOD | 0.00 | <LOD | 0.00 | <LOD | 0.00 | <LOD | 0.00 | <LOD | 0.00 | <LOD | 0.02 | <LOD | 0.00 | <LOD | 0.01 | <LOD | 0.00 | <LOD | 0.00 |
| <i>PFDS</i>         | <LOD | 0.00 | <LOD | 0.00 | <LOD | 0.00 | <LOD | 0.00 | <LOD | 0.00 | <LOD | 0.00 | <LOD | 0.00 | <LOD | 0.00 | <LOD | 0.00 | <LOD | 0.00 | <LOD | 0.00 | <LOD | 0.00 |
| <i>ΣPFSA</i>        | 0.55 | 0.00 | 1.38 | 0.00 | 0.26 | 0.00 | 0.39 | 0.00 | 0.23 | 0.00 | 0.25 | 0.00 | 0.10 | 0.00 | 0.42 | 0.00 | 0.19 | 0.00 | 0.39 | 0.00 | 0.11 | 0.00 | 0.12 | 0.00 |
| <i>FBSA</i>         | <LOD | 0.00 | <LOD | 0.00 | <LOD | 0.00 | <LOD | 0.00 | <LOD | 0.00 | <LOD | 0.00 | <LOD | 0.00 | <LOD | 0.00 | <LOD | 0.00 | <LOD | 0.00 | <LOD | 0.00 | <LOD | 0.00 |
| <i>FHxSA</i>        | <LOD | 0.00 | <LOD | 0.00 | <LOD | 0.00 | <LOD | 0.00 | <LOD | 0.00 | <LOD | 0.00 | <LOD | 0.00 | <LOD | 0.00 | <LOD | 0.00 | <LOD | 0.00 | <LOD | 0.00 | <LOD | 0.00 |
| <i>FOSA</i>         | <LOD | 0.00 | <LOD | 0.00 | <LOD | 0.00 | <LOD | 0.00 | <LOD | 0.00 | <LOD | 0.00 | <LOD | 0.00 | <LOD | 0.00 | <LOD | 0.00 | <LOD | 0.00 | <LOD | 0.00 | <LOD | 0.00 |
| <i>L-MeFOSAA</i>    | <LOD | 0.00 | <LOD | 0.00 | <LOD | 0.00 | <LOD | 0.00 | <LOD | 0.00 | <LOD | 0.00 | <LOD | 0.00 | <LOD | 0.00 | <LOD | 0.00 | <LOD | 0.00 | <LOD | 0.00 | <LOD | 0.00 |
| <i>Br-MeFOSAA</i>   | <LOD | 0.00 | <LOD | 0.00 | <LOD | 0.00 | <LOD | 0.00 | <LOD | 0.00 | <LOD | 0.00 | <LOD | 0.00 | <LOD | 0.00 | <LOD | 0.00 | <LOD | 0.00 | <LOD | 0.00 | <LOD | 0.00 |
| <i>L-EtFOSAA</i>    | <LOD | 0.00 | <LOD | 0.00 | <LOD | 0.00 | <LOD | 0.00 | <LOD | 0.00 | <LOD | 0.00 | <LOD | 0.00 | <LOD | 0.06 | <LOD | 0.00 | <LOD | 0.00 | <LOD | 0.00 | <LOD | 0.00 |
| <i>Br-EtFOSAA</i>   | <LOD | 0.00 | <LOD | 0.00 | <LOD | 0.00 | <LOD | 0.00 | <LOD | 0.00 | <LOD | 0.00 | <LOD | 0.00 | 0.06 | 0.08 | <LOD | 0.00 | <LOD | 0.00 | <LOD | 0.00 | <LOD | 0.00 |
| <i>4:2FTS</i>       | <LOD | 0.00 | <LOD | 0.00 | <LOD | 0.00 | <LOD | 0.00 | <LOD | 0.00 | <LOD | 0.00 | <LOD | 0.00 | <LOD | 0.00 | <LOD | 0.00 | <LOD | 0.00 | <LOD | 0.00 | <LOD | 0.00 |
| <i>6:2FTS</i>       | <LOD | 0.00 | 0.14 | 0.00 | <LOD | 0.00 | 0.15 | 0.01 | 0.05 | 0.01 | <LOD | 0.00 | 0.09 | 0.09 | 0.19 | 0.00 | <LOD | 0.00 | 0.14 | 0.00 | <LOD | 0.00 | 0.12 | 0.00 |
| <i>8:2FTS</i>       | 0.11 | 0.00 | 0.21 | 0.02 | 0.21 | 0.01 | 0.92 | 0.21 | 0.18 | 0.00 | 1.03 | 0.05 | <LOD | 0.00 | 0.35 | 0.11 | <LOD | 0.00 | 0.14 | 0.04 | 0.20 | 0.01 | <LOD | 0.00 |
| <i>ADONA</i>        | <LOD | 0.00 | <LOD | 0.00 | <LOD | 0.00 | <LOD | 0.00 | <LOD | 0.00 | <LOD | 0.00 | <LOD | 0.00 | <LOD | 0.00 | <LOD | 0.00 | <LOD | 0.00 | <LOD | 0.00 | <LOD | 0.00 |
| <i>9Cl-PF3ONS</i>   | <LOD | 0.00 | <LOD | 0.00 | <LOD | 0.00 | <LOD | 0.00 | <LOD | 0.00 | <LOD | 0.00 | <LOD | 0.00 | <LOD | 0.00 | <LOD | 0.00 | <LOD | 0.00 | <LOD | 0.00 | <LOD | 0.00 |
| <i>11Cl-PF3OUDS</i> | <LOD | 0.00 | <LOD | 0.00 | <LOD | 0.00 | <LOD | 0.00 | <LOD | 0.00 | <LOD | 0.00 | <LOD | 0.00 | <LOD | 0.00 | <LOD | 0.00 | <LOD | 0.00 | <LOD | 0.00 | <LOD | 0.00 |
| <i>PF4OPeA</i>      | <LOD | 0.00 | <LOD | 0.00 | <LOD | 0.00 | <LOD | 0.00 | <LOD | 0.00 | <LOD | 0.00 | <LOD | 0.00 | <LOD | 0.00 | <LOD | 0.00 | <LOD | 0.00 | <LOD | 0.00 | <LOD | 0.00 |
| <i>PF5OHxA</i>      | <LOD | 0.00 | <LOD | 0.00 | <LOD | 0.00 | <LOD | 0.00 | <LOD | 0.00 | <LOD | 0.00 | <LOD | 0.00 | <LOD | 0.00 | <LOD | 0.00 | <LOD | 0.00 | <LOD | 0.00 | <LOD | 0.00 |
| <i>3-6-OPFHpA</i>   | <LOD | 0.00 | <LOD | 0.00 | <LOD | 0.00 | <LOD | 0.00 | <LOD | 0.00 | <LOD | 0.00 | <LOD | 0.00 | <LOD | 0.00 | <LOD | 0.00 | <LOD | 0.00 | <LOD | 0.00 | <LOD | 0.00 |
| <i>PFEESA</i>       | <LOD | 0.00 | <LOD | 0.00 | <LOD | 0.00 | <LOD | 0.00 | <LOD | 0.00 | <LOD | 0.00 | <LOD | 0.00 | <LOD | 0.00 | <LOD | 0.00 | <LOD | 0.00 | <LOD | 0.00 | <LOD | 0.00 |
| <i>10:2FTS</i>      | 0.32 | 0.02 | 0.37 | 0.10 | 0.66 | 0.13 | 1.60 | 0.40 | 0.46 | 0.02 | 1.95 | 0.73 | <LOD | 0.00 | 0.35 | 0.01 | 0.07 | 0.01 | 0.14 | 0.05 | 0.37 | 0.03 | <LOD | 0.00 |
| <i>PFECHS</i>       | 0.05 | 0.00 | <LOD | 0.00 | <LOD | 0.00 | <LOD | 0.00 | <LOD | 0.00 | <LOD | 0.00 | <LOD | 0.00 | <LOD | 0.00 | <LOD | 0.00 | <LOD | 0.00 | <LOD | 0.00 | <LOD | 0.00 |
| <i>4:2FTA</i>       | <LOD | 0.00 | <LOD | 0.00 | <LOD | 0.00 | <LOD | 0.00 | <LOD | 0.00 | <LOD | 0.00 | <LOD | 0.00 | <LOD | 0.00 | <LOD | 0.00 | <LOD | 0.00 | <LOD | 0.00 | <LOD | 0.00 |
| <i>6:2FTA</i>       | <LOD | 0.00 | <LOD | 0.00 | <LOD | 0.00 | <LOD | 0.00 | <LOD | 0.00 | <LOD | 0.00 | <LOD | 0.00 | <LOD | 0.00 | <LOD | 0.00 | <LOD | 0.00 | <LOD | 0.00 | <LOD | 0.00 |



|                   |        |      |        |      |        |      |        |      |        |      |        |      |       |      |        |      |        |      |        |      |        |      |        |      |
|-------------------|--------|------|--------|------|--------|------|--------|------|--------|------|--------|------|-------|------|--------|------|--------|------|--------|------|--------|------|--------|------|
| <i>8:2FTA</i>     | <LOD   | 0.00 | <LOD   | 0.00 | <LOD   | 0.00 | <LOD   | 0.00 | <LOD   | 0.00 | <LOD   | 0.00 | <LOD  | 0.00 | <LOD   | 0.00 | <LOD   | 0.00 | <LOD   | 0.00 | <LOD   | 0.00 | <LOD   | 0.00 |
| <i>6:2diPAP</i>   | <LOD   | 0.00 | <LOD   | 0.00 | <LOD   | 0.00 | <LOD   | 0.00 | <LOD   | 0.00 | <LOD   | 0.00 | <LOD  | 0.00 | <LOD   | 0.00 | <LOD   | 0.00 | <LOD   | 0.00 | <LOD   | 0.00 | <LOD   | 0.00 |
| <i>6:6PFPI</i>    | <LOD   | 0.00 | 0.69   | 0.05 | <LOD   | 0.00 | 0.82   | 0.10 | <LOD   | 0.00 | 0.83   | 0.14 | <LOD  | 0.00 | 0.84   | 0.08 | <LOD   | 0.00 | 0.64   | 0.02 | <LOD   | 0.00 | 0.60   | 0.05 |
| <i>8:2PAP</i>     | <LOD   | 0.00 | <LOD   | 0.00 | <LOD   | 0.00 | <LOD   | 0.00 | <LOD   | 0.00 | <LOD   | 0.00 | <LOD  | 0.00 | <LOD   | 0.00 | <LOD   | 0.00 | <LOD   | 0.00 | <LOD   | 0.00 | <LOD   | 0.00 |
| <i>EtFOSA</i>     | <LOD   | 0.02 | 0.22   | 0.02 | <LOD   | 0.00 | 0.39   | 0.18 | <LOD   | 0.01 | 0.59   | 0.23 | <LOD  | 0.00 | <LOD   | 0.00 | <LOD   | 0.00 | <LOD   | 0.00 | <LOD   | 0.00 | <LOD   | 0.00 |
| <i>MeFOSA</i>     | <LOD   | 0.00 | <LOD   | 0.00 | <LOD   | 0.00 | <LOD   | 0.00 | <LOD   | 0.00 | <LOD   | 0.00 | <LOD  | 0.00 | <LOD   | 0.00 | <LOD   | 0.00 | <LOD   | 0.00 | <LOD   | 0.00 | <LOD   | 0.00 |
| <i>MeFOSE</i>     | <LOD   | 0.00 | <LOD   | 0.00 | <LOD   | 0.00 | <LOD   | 0.00 | <LOD   | 0.00 | <LOD   | 0.00 | <LOD  | 0.00 | <LOD   | 0.00 | <LOD   | 0.00 | <LOD   | 0.00 | <LOD   | 0.00 | <LOD   | 0.00 |
| <i>EtFOSE</i>     | <LOD   | 0.00 | <LOD   | 0.00 | <LOD   | 0.00 | <LOD   | 0.00 | <LOD   | 0.00 | <LOD   | 0.00 | <LOD  | 0.00 | <LOD   | 0.00 | <LOD   | 0.00 | <LOD   | 0.00 | <LOD   | 0.00 | <LOD   | 0.00 |
| <i>PFHO-DA</i>    | <LOD   | 0.00 | <LOD   | 0.00 | <LOD   | 0.00 | <LOD   | 0.00 | <LOD   | 0.00 | <LOD   | 0.00 | <LOD  | 0.00 | <LOD   | 0.00 | <LOD   | 0.00 | <LOD   | 0.00 | <LOD   | 0.00 | <LOD   | 0.00 |
| $\Sigma$ Prec     | 0.57   | 0.00 | 1.62   | 0.00 | 0.97   | 0.00 | 3.87   | 0.00 | 0.80   | 0.00 | 4.40   | 0.00 | 0.09  | 0.00 | 1.79   | 0.00 | 0.07   | 0.00 | 1.06   | 0.00 | 0.56   | 0.00 | 0.72   | 0.00 |
| <i>Total PFAS</i> | 486.47 | 0.00 | 529.40 | 0.00 | 388.08 | 0.00 | 396.98 | 0.00 | 440.15 | 0.00 | 490.90 | 0.00 | 98.82 | 0.00 | 215.59 | 0.00 | 120.74 | 0.00 | 371.88 | 0.00 | 100.26 | 0.00 | 137.65 | 0.00 |

## Reference

- Bil, W., Zeilmaker, M., Fragki, S., Lijzen, J., Verbruggen, E., Bokkers, B., 2022. Response to Letter to the Editor on Bil et al. 2021 “Risk Assessment of Per- and Polyfluoroalkyl Substance Mixtures: A Relative Potency Factor Approach.” *Environmental Toxicology and Chemistry* 41, 13–18. <https://doi.org/10.1002/etc.5236>
- Bil, W., Zeilmaker, M., Fragki, S., Lijzen, J., Verbruggen, E., Bokkers, B., 2021. Risk Assessment of Per- and Polyfluoroalkyl Substance Mixtures: A Relative Potency Factor Approach. *Environmental Toxicology and Chemistry* 40, 859–870.
- Rietjens, I.M.C.M., Schriks, M., Houtman, C.J., Dingemans, M.M.L., Wezel, A.P. van, 2022. Letter to the Editor on Bil et al. 2021 “Risk Assessment of Per- and Polyfluoroalkyl Substance Mixtures: A Relative Potency Factor Approach.” *Environmental Toxicology and Chemistry* 41, 7–12.
